# Supplementary material
Source: bioRxiv or medRxiv preprint supplement (https://medrxiv.org/content/medrxiv/early/2023/03/07/2023.03.06.23286834/DC1/embed/media-1.pdf)
Supplement: Supplementary file [file media-1.pdf]

## ONLINE DATA SUPPLEMENT

**SARS-CoV-2 viral replication persists in the human lung for several weeks after onset of symptomatic severe COVID-19 and is associated with attenuated pulmonary immunity and variant-specific clinical sequelae**

Tomasicchio M<sup>1,2</sup>, Jaumdally S<sup>1,2</sup>, Pooran A<sup>1,2</sup>, Esmail A<sup>1,2</sup>, Wilson L<sup>1,2</sup>, Kotze A<sup>1,2</sup>, Semple L<sup>1,2</sup>, Meier S<sup>1,2</sup>, Pillay K<sup>5</sup>, Roberts R<sup>5</sup>, Kriel R<sup>5</sup>, Meldau R<sup>1,2</sup>, Oelofse S<sup>1,2</sup>, Mandviwala C<sup>1,2</sup>, Burns J<sup>1,2</sup>, Londt R<sup>1,2</sup>, Davids M<sup>1,2</sup>, van der Merwe<sup>1,2</sup> C, Roomaney A<sup>1,2</sup>, Kühn L<sup>1,2</sup>, Perumal T<sup>1,2</sup>, Scott A.J<sup>1,2</sup>, Hale M.J<sup>6</sup>, Baillie V<sup>7</sup>, Mahtab S<sup>7</sup>, Williamson C<sup>8</sup>, Joseph R<sup>8</sup>, Sigal A<sup>9</sup>, Joubert I<sup>10</sup>, Piercy J<sup>10</sup>, Thomson D<sup>10</sup>, Fredericks DL<sup>10</sup>, Miller MGA<sup>10</sup>, Nunes M<sup>7</sup>, Madhi S.A<sup>7</sup>, Dheda K<sup>1,2,3,4</sup>.

<sup>1</sup> Centre for Lung Infection and Immunity, Division of Pulmonology, Department of Medicine, University of Cape Town and UCT Lung Institute, Cape Town, South Africa.

<sup>2</sup> South African MRC Centre for the Study of Antimicrobial Resistance, University of Cape Town, Cape Town, South Africa.

<sup>3</sup> Institute of Infectious Diseases and Molecular Medicine, University of Cape Town, Cape Town, South Africa.

<sup>4</sup> Faculty of Infectious and Tropical Diseases, Department of Immunology and Infection, London School of Hygiene & Tropical Medicine, London, UK.

<sup>5</sup> Division of Anatomical Pathology, Department of Pathology, University of Cape Town, Cape Town, South Africa

<sup>6</sup> Division of Anatomical Pathology, Faculty of Health Sciences, University of the Witwatersrand.

<sup>7</sup> South African Medical Research Council, Vaccines and Infectious Diseases Analytics Research Unit, Faculty of Health Sciences, University of the Witwatersrand, Johannesburg, South Africa; Department of Science and Technology/National Research Foundation South African Research Chair Initiative in

Vaccine Preventable Diseases, Faculty of Health Sciences, University of the Witwatersrand, Johannesburg, South Africa.

<sup>8</sup> Division of Medical Virology, Institute of Infectious Disease and Molecular Medicine, University of Cape Town, Cape Town, South Africa.

<sup>9</sup> Africa Health Research Institute, Durban, South Africa.

<sup>10</sup> Division of Critical Care, Department of Anaesthesia and Perioperative Medicine, University of Cape Town, South Africa

Correspondence: Keertan Dheda, Centre for Lung Infection and Immunity, Division of Pulmonology and UCT Lung Institute, Dept of Medicine, University of Cape Town, South Africa. E-mail: keertan.dheda@uct.ac.za

## Supplementary methods.

### Sample size.

Samples sizes were calculated based on our primary endpoint measure i.e. the proportion of nasopharyngeal versus organ biopsy samples that were viral culture-positive. Based on the literature, viral replication can be demonstrated by culture approximately up to about 14 days post symptom onset. At ~14 days post symptom-onset, assuming a nasopharyngeal viral culture positivity rate of 5% or less and lung biopsy positivity rate of ~40%, a case to control ratio of 2:1, ~40 lung biopsy samples and ~20 controls, would allow us to detect a significant difference in groups at an alpha of 0.05 and with 80% power (OpenEpi, Version 3, opensource calculator). Thus, we were powered to detect a ~35% difference between the groups.

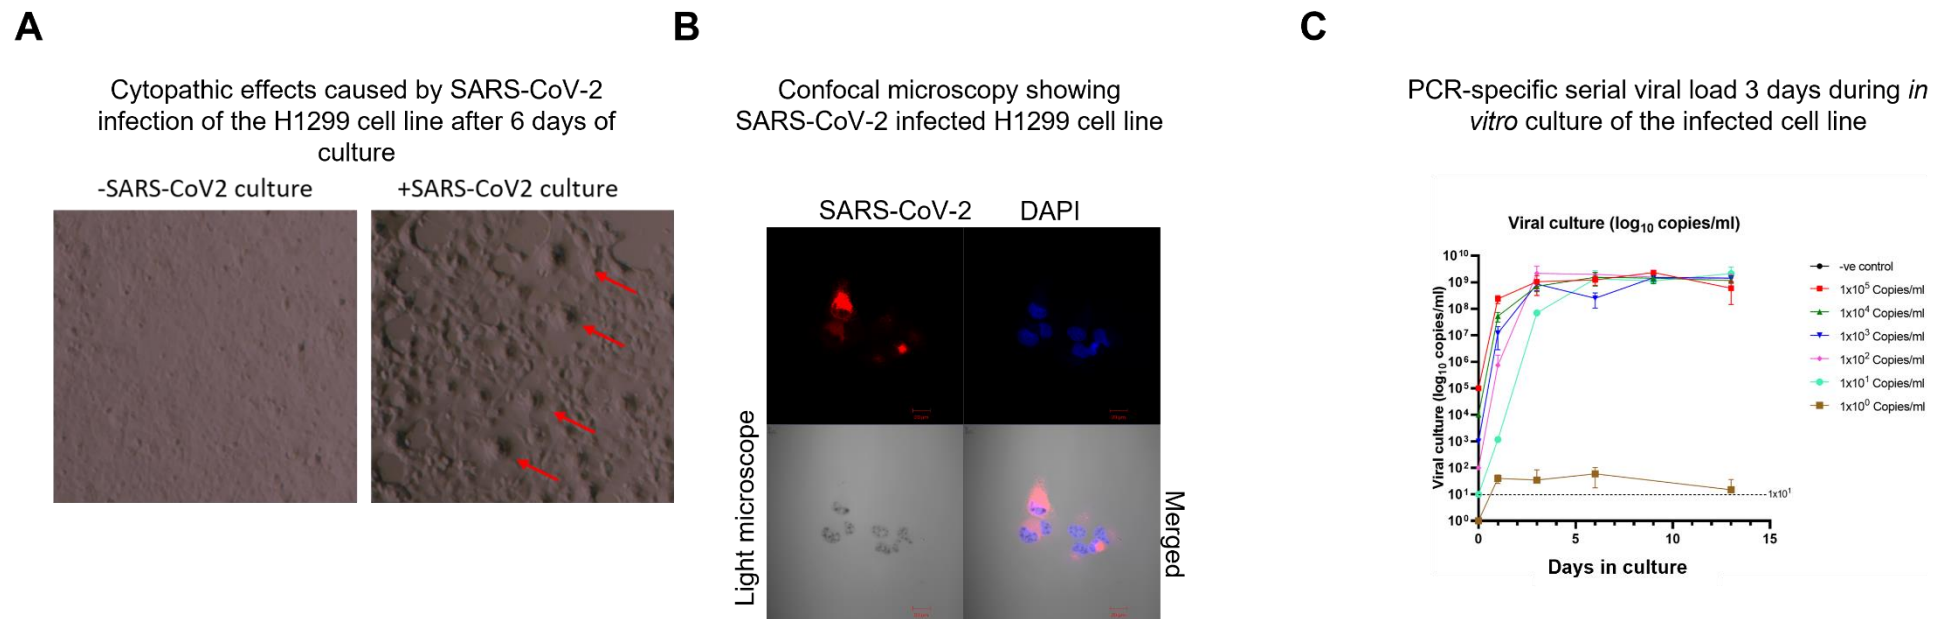

**Figure S1. *In vitro* culture of SARS-CoV-2.** (A) Light microscope images showing SARS-CoV-2 viral-induced cytopathic effects (red arrow). (B) Confocal microscopy showing SARS-CoV-2 (red) infecting the cell line. DAPI (blue) was used as the nuclear stain. (C) The limit of detection (LOD) for the PCR assay to detect replicating competent SARS-CoV-2. SARS-CoV-2 viral stock was diluted in 10-fold dilutions from  $1 \times 10^5$  to 1 copy/ml and co-cultured with confluent H1299 ACE2 cells in a 24-well plate for 9 days. Aliquots were analysed by PCR for viral load on days 1, 3, 6 and 9. The relative viral load (copies/ml) are shown. The dotted line represents the LOD for viral load ( $1 \times 10^1$  copies/ml).

Supplementary results.

Table S1. Demographic and clinical characteristics of the decedents.

|                                                                                              | All Patients<br>n=42 | Lung biopsy<br>culture-positive<br>n=16 | Lung biopsy<br>culture-negative<br>n=26 | #p-value     |
|----------------------------------------------------------------------------------------------|----------------------|-----------------------------------------|-----------------------------------------|--------------|
| <b>Gender</b>                                                                                |                      |                                         |                                         | 0.694        |
| Male                                                                                         | 47.6% (20/42)        | 43.8% (7/16)                            | 50% (13/26)                             |              |
| Female                                                                                       | 52.3% (22/42)        | 56.3% (9/16)                            | 50% (13/26)                             |              |
| <b>Median age in years<br/>(range)</b>                                                       | 53 (41-62)           | 58.5 (45.5-64)                          | 49.5 (41-60)                            | 0.2          |
| <b>Admission to ICU</b>                                                                      |                      |                                         |                                         |              |
| <b>*BMI status</b>                                                                           |                      |                                         |                                         |              |
| Underweight                                                                                  | 37.5% (9/24)         | 25% (2/8)                               | 43.8% (7/16)                            | 0.371        |
| Normal                                                                                       | 25% (6/24)           | 25% (2/8)                               | 25% (4/16)                              | -            |
| Overweight                                                                                   | 25% (6/24)           | 25% (2/8)                               | 12.5% (3/16)                            | 0.722        |
| Obese                                                                                        | 4% (1/24)            | 12.5% (1/8)                             | 5% (1/16)                               | 0.602        |
| Morbidly obese                                                                               | 12.5% (3/24)         | 12.5% (1/8)                             | 6% (1/16)                               | 0.602        |
| Unknown                                                                                      | 83.3% (20/24)        | 62.5% (5/8)                             | 93.8% (15/16)                           | 0.053        |
| <b>*Co- morbidities</b>                                                                      |                      |                                         |                                         |              |
| COPD/Chronic bronchitis                                                                      | 16.6% (4/24)         | 12.5% (1/8)                             | 18.8% (3/16)                            | 0.699        |
| Obesity                                                                                      | 41.7% (10/24)        | 50% (4/8)                               | 37.5% (6/16)                            | 0.558        |
| Diabetes                                                                                     | 16.6% (4/24)         | 25% (2/8)                               | 12.5% (2/16)                            | 0.540        |
| Cancer                                                                                       | 33.3% (8/24)         | 12.5% (1/8)                             | 43.8% (7/16)                            | 0.126        |
| Hypertension                                                                                 | 8.3% (2/24)          | 12.5% (1/8)                             | 6% (1/16)                               | 0.602        |
| Smoker                                                                                       | 29.2% (7/24)         | 0% (0/8)                                | 50% (7/16)                              | <b>0.026</b> |
| ΩOther                                                                                       | 4% (1/24)            | 0% (0/8)                                | 6% (1/16)                               | 0.470        |
|                                                                                              |                      |                                         |                                         |              |
| <b>HIV-positive</b>                                                                          | 14.3% (6/42)         | 18.8% (3/16)                            | 11.5% (3/26)                            | 0.517        |
| <b>♦Vaccination status</b>                                                                   |                      |                                         |                                         |              |
| Yes                                                                                          | 12.5% (3/24)         | 0% (0/8)                                | 18.8% (3/16)                            | 0.190        |
| No                                                                                           | 87.5% (21/24)        | 100% (8/8)                              | 81.2% (13/16)                           | 0.190        |
| <b>Smoking status</b>                                                                        |                      |                                         |                                         |              |
| Current smoker                                                                               | 2.4% (1/42)          | 6.3% (1/16)                             | 0% (0/26)                               | 0.197        |
| Ex-smoker                                                                                    | 9.5% (4/42)          | 12.5% (2/16)                            | 7.7% (2/26)                             | 0.606        |
| Never smoked                                                                                 | 31% (13/42)          | 37.5% (6/16)                            | 27% (7/26)                              | 0.472        |
| Unknown                                                                                      | 31% (13/42)          | 31.3% (5/16)                            | 30.8% (8/26)                            | 0.974        |
| <b>SARS-CoV-2 variant<br/>detected in the Beta group<br/>by whole genome<br/>sequencing</b>  |                      |                                         |                                         |              |
| Beta B.1.1.448                                                                               | 12.5% (1/8)          | 12.5% (1/8)                             | -                                       | -            |
| Beta V2                                                                                      | 25% (2/8)            | 25% (2/8)                               | -                                       | -            |
| Unknown♦                                                                                     | 83.3% (15/18)        | 62.5% (5/8)                             | 100% (10/10)                            | -            |
| <b>SARS-CoV-2 variant<br/>detected in the Delta group<br/>by whole genome<br/>sequencing</b> |                      |                                         |                                         |              |
| Alpha V1                                                                                     | 4% (1/24)            | 12.5% (1/8)                             | 0% (0/16)                               | 0.149        |

|                                                                                         |                          |                           |                          |              |
|-----------------------------------------------------------------------------------------|--------------------------|---------------------------|--------------------------|--------------|
| Beta V2                                                                                 | 4% (1/24)                | 0% (0/8)                  | 6.3% (1/16)              | 0.470        |
| Delta 21J                                                                               | 29.2% (7/24)             | 25% (2/8)                 | 31.3% (5/16)             | 0.751        |
| Unknown*                                                                                | 62.5% (15/24)            | 50% (4/8)                 | 68.8% (11/16)            | 0.371        |
| <b>Secondary bacterial infection present (Biofire multiplex PCR)</b>                    |                          |                           |                          |              |
| Yes                                                                                     | 40.5% (17/42)            | 50% (8/16)                | 34.6% (9/26)             | 0.324        |
| No                                                                                      | 40.5% (17/42)            | 37.5% (6/16)              | 42.3% (11/26)            | 0.758        |
| None detected                                                                           | 16.7% (7/42)             | 12.5% (2/16)              | 19.2% (5/26)             | 0.570        |
| Unknown                                                                                 | 2.4% (1/42)              | 0% (0/16)                 | 3.8% (1/26)              | 0.427        |
| <b>Bacterial bronchopneumonia (microbiologically and histopathologically confirmed)</b> | 11% (4/38)               | 21% (3/14)                | 4% (1/24)                | 0.129        |
| <b>Steroid usage</b>                                                                    |                          |                           |                          |              |
| Yes                                                                                     | 79.5 % (33/42)           | 62.5% (10/16)             | 88.5% (23/26)            | <b>0.047</b> |
| No                                                                                      | 21.4% (9/42)             | 37.5% (6/16)              | 11.5% (3/26)             | <b>0.047</b> |
| <b>Median days of steroid usage (IQR)</b>                                               | 8 days (4.5-12)<br>n=24  | 4.5 days (2.5-6.5)<br>n=8 | 8 days (4.5-12)<br>n=16  | <b>0.015</b> |
| <b>COVID-19 status at admission as assessed by nasopharyngeal swab PCR</b>              |                          |                           |                          |              |
| PCR positive                                                                            | 90.5% (38/42)            | 93.8% (15/16)             | 88.5% (23/26)            | 0.571        |
| COVID-19 antigen positive (no PCR result)                                               | 7.1% (3/42)              | 6.3% (1/16)               | 11.5% (3/26)             | 0.571        |
| Unknown                                                                                 | 2.4% (1/42)              | 0% (0/16)                 | 3.8% (1/26)              | 0.427        |
| Median Ct (IQR)                                                                         | 26.1 (21.6-28.3)<br>n=27 | 26.3 (20.9-28.3)<br>n=11  | 25.6 (23.4-29.7)<br>n=16 | 0.429        |
| Ct value unknown                                                                        | n=11                     | n=4                       | n=7                      |              |
| <b>COVID-19 status at time of MITS as assessed by nasopharyngeal swab PCR</b>           |                          |                           |                          |              |
| PCR positive                                                                            | 85.7% (36/42)            | 100% (16/16)              | 76.9% (20/26)            | <b>0.038</b> |
| PCR negative                                                                            | 14.3% (6/42)             | 0% (0/16)                 | 23.1% (6/26)             | <b>0.038</b> |
| Median Ct (IQR)                                                                         | 23.5 (20.5-29.9)<br>n=33 | 23.5 (17.7-25.6)<br>n=15  | 26.2 (21.4-30.1)<br>n=18 | 0.166        |
| Ct value unknown                                                                        | n=9                      | n=1                       | n=8                      |              |
| <b>Median time from onset of symptoms to death (range)</b>                              | 17 (4-58)<br>n=42        | 15 (5-27)<br>n=16         | 18 (4-58)<br>n=26        | 0.112        |
| <b>Median days from admission to ICU to death</b>                                       | 5 days (1-48)<br>n=42    | 3 days (1-17)<br>n=16     | 8 days (0-48)<br>n=26    | 0.061        |

|                                                                                   |                                     |                      |                        |       |
|-----------------------------------------------------------------------------------|-------------------------------------|----------------------|------------------------|-------|
| (range)                                                                           |                                     |                      |                        |       |
| <b>Median days from administration of high flow nasal oxygen to death (range)</b> | 11 days (1-24)<br>n=23 <sup>Δ</sup> | 7 days (1-17)<br>n=7 | 13 days (5-24)<br>n=16 | 0.053 |

<sup>#</sup>p-values are for comparison between lung culture-positive and negative.

<sup>\*</sup>BMI status was only recorded for the Delta group.

<sup>\*</sup>Co-morbidities were only recorded for the Delta group. No patients had asthma, current TB, other chronic lung disease, cardiovascular disease, CVA/stroke, malnutrition, organ failure/disease, anaemia or epilepsy.

<sup>Δ</sup> Vaccination status was only recorded for the Delta group.

<sup>Ω</sup>Patients with dyslipidemia/varicose veins, ex-smoker, previous lateral medullary syndrome, previous heavy alcohol use, ischemic heart disease or trisomy.

<sup>Υ</sup>Ct value at day of MITS sampling missing for 9 patients.

<sup>♦</sup> Either the viral load was too low or the sample was not available.

<sup>Δ</sup> Only recorded for the Delta group.

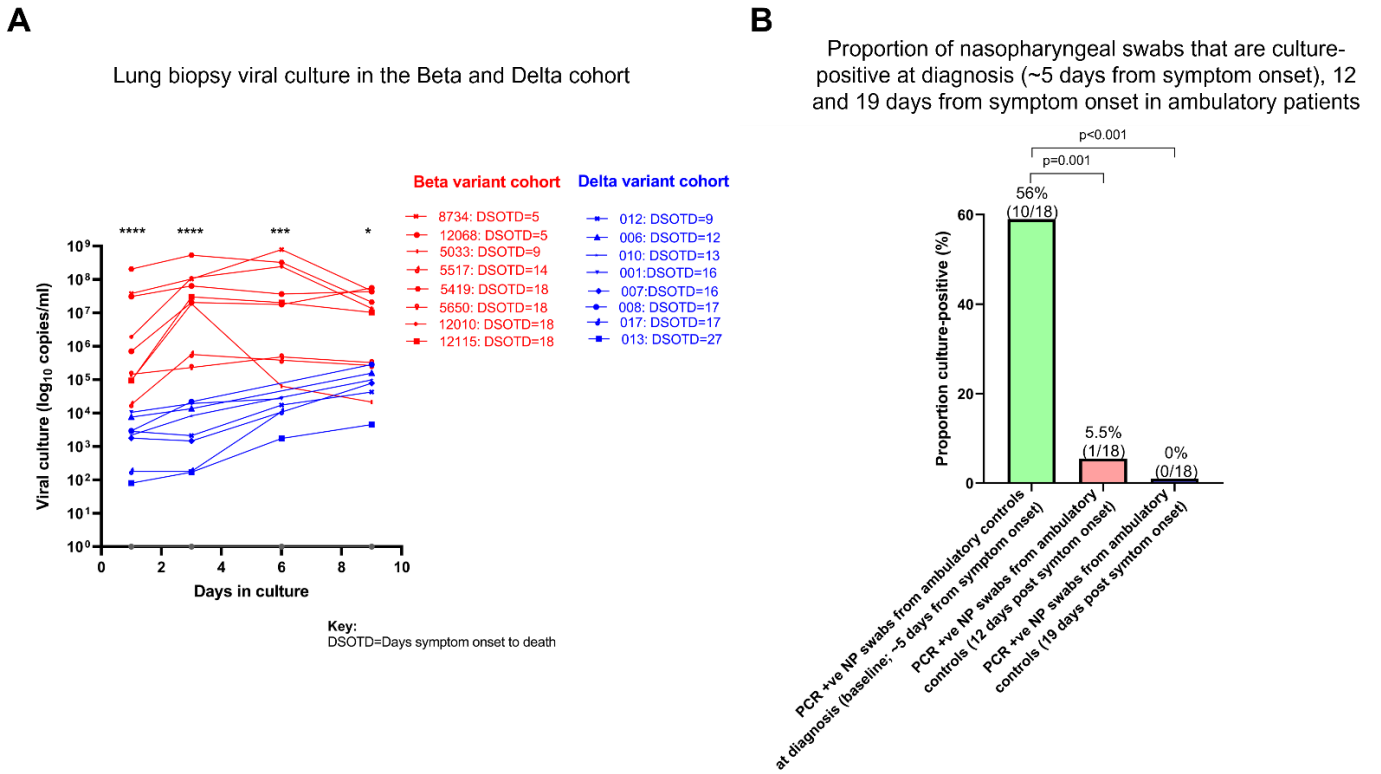

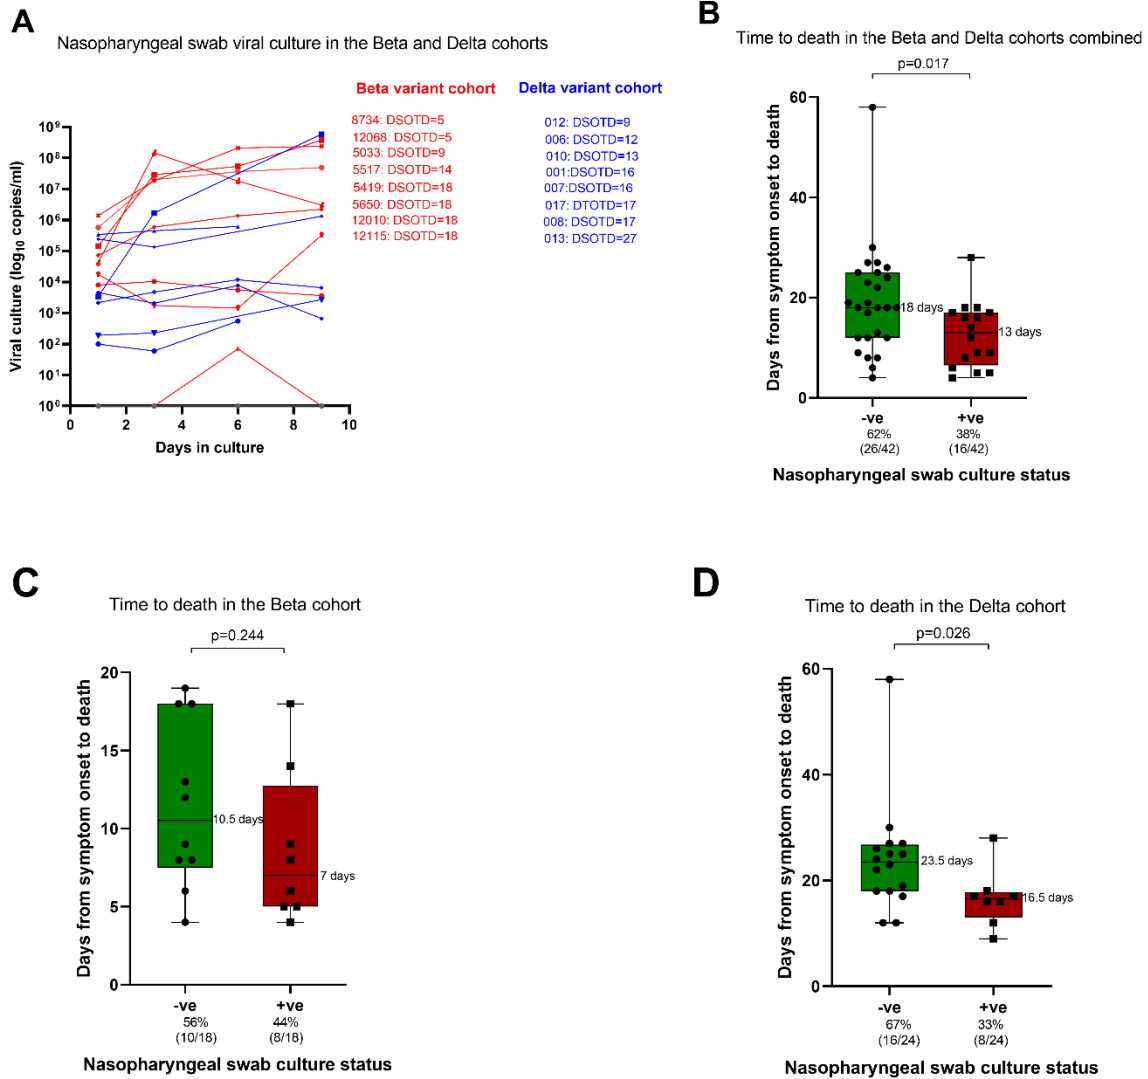

**Figure S3. Previously ventilated decedents had active replicating virus in the upper respiratory tract for up to 27 days post symptom onset to death.** (A) The lung cancer cell line, H1299 ACE2, was used to culture SARS-CoV-2. The nasopharyngeal swabs in universal transport medium were initially filtered through a 0.22 $\mu$ m filter prior to inoculation. The inoculated cultures were grown in a humidified 37°C incubator with 5% CO<sub>2</sub> and cytopathic effect (CPE) and viral replication were monitored on days 1, 3, 6 and 9 by PCR. The days from symptom onset to death for the culture-negative (-ve; green) and culture-positive (+ve; red) groups are shown. The dotted lines represent the median days from symptom onset to death for the lung culture-positive (13 days) and lung culture-negative (18 days) decedents. The days from symptom onset to death for the culture-negative (-ve; green) and culture-positive (+ve; red) groups are shown for the Beta (B) and Delta (C) cohorts. The median days from symptom onset to death for the culture-positive (7 days for the Beta cohort and 16.5 days for the Delta cohort) and culture-negative (10.5 days for the Beta cohort and 23.5 days for the Delta cohort) participants are shown.

Similarly, to the lung culture data, we show that overall, the nasopharyngeal swab culture-positive group had accelerated death (13 day from symptom onset to death) compared to the lung culture-negative group (18 days from symptom onset to death; Figure S3B;  $p=0.017$ ).



**A**

Proportion secondary bacterial infection in the Beta and Delta cohort (n=42)

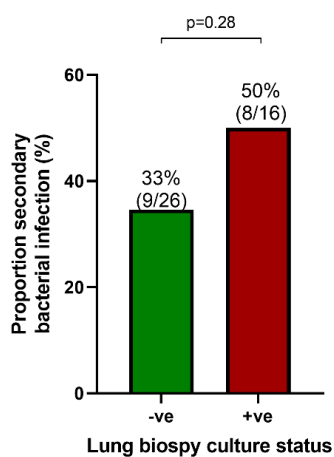**B**

Proportion secondary bacterial infection in the Beta cohort (n=18)

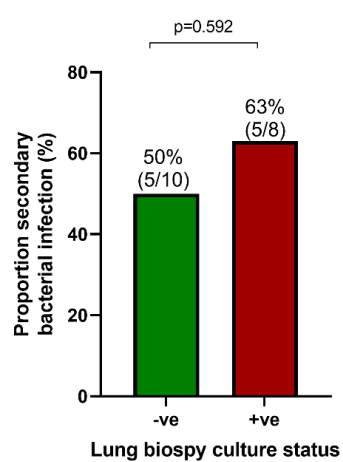**C**

Proportion secondary bacterial infection in the Delta cohort (n=24)

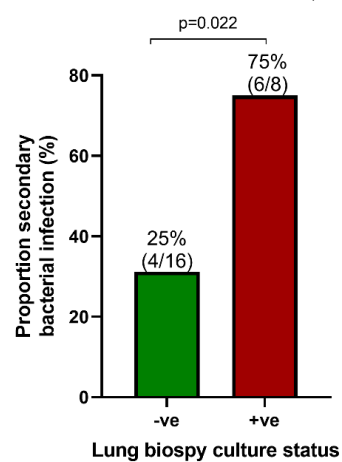

**Figure S4.** The culture-positive participants from the Delta cohort, but not the Beta cohort, had a higher frequency of secondary bacterial infection compared to the culture-negative participants.

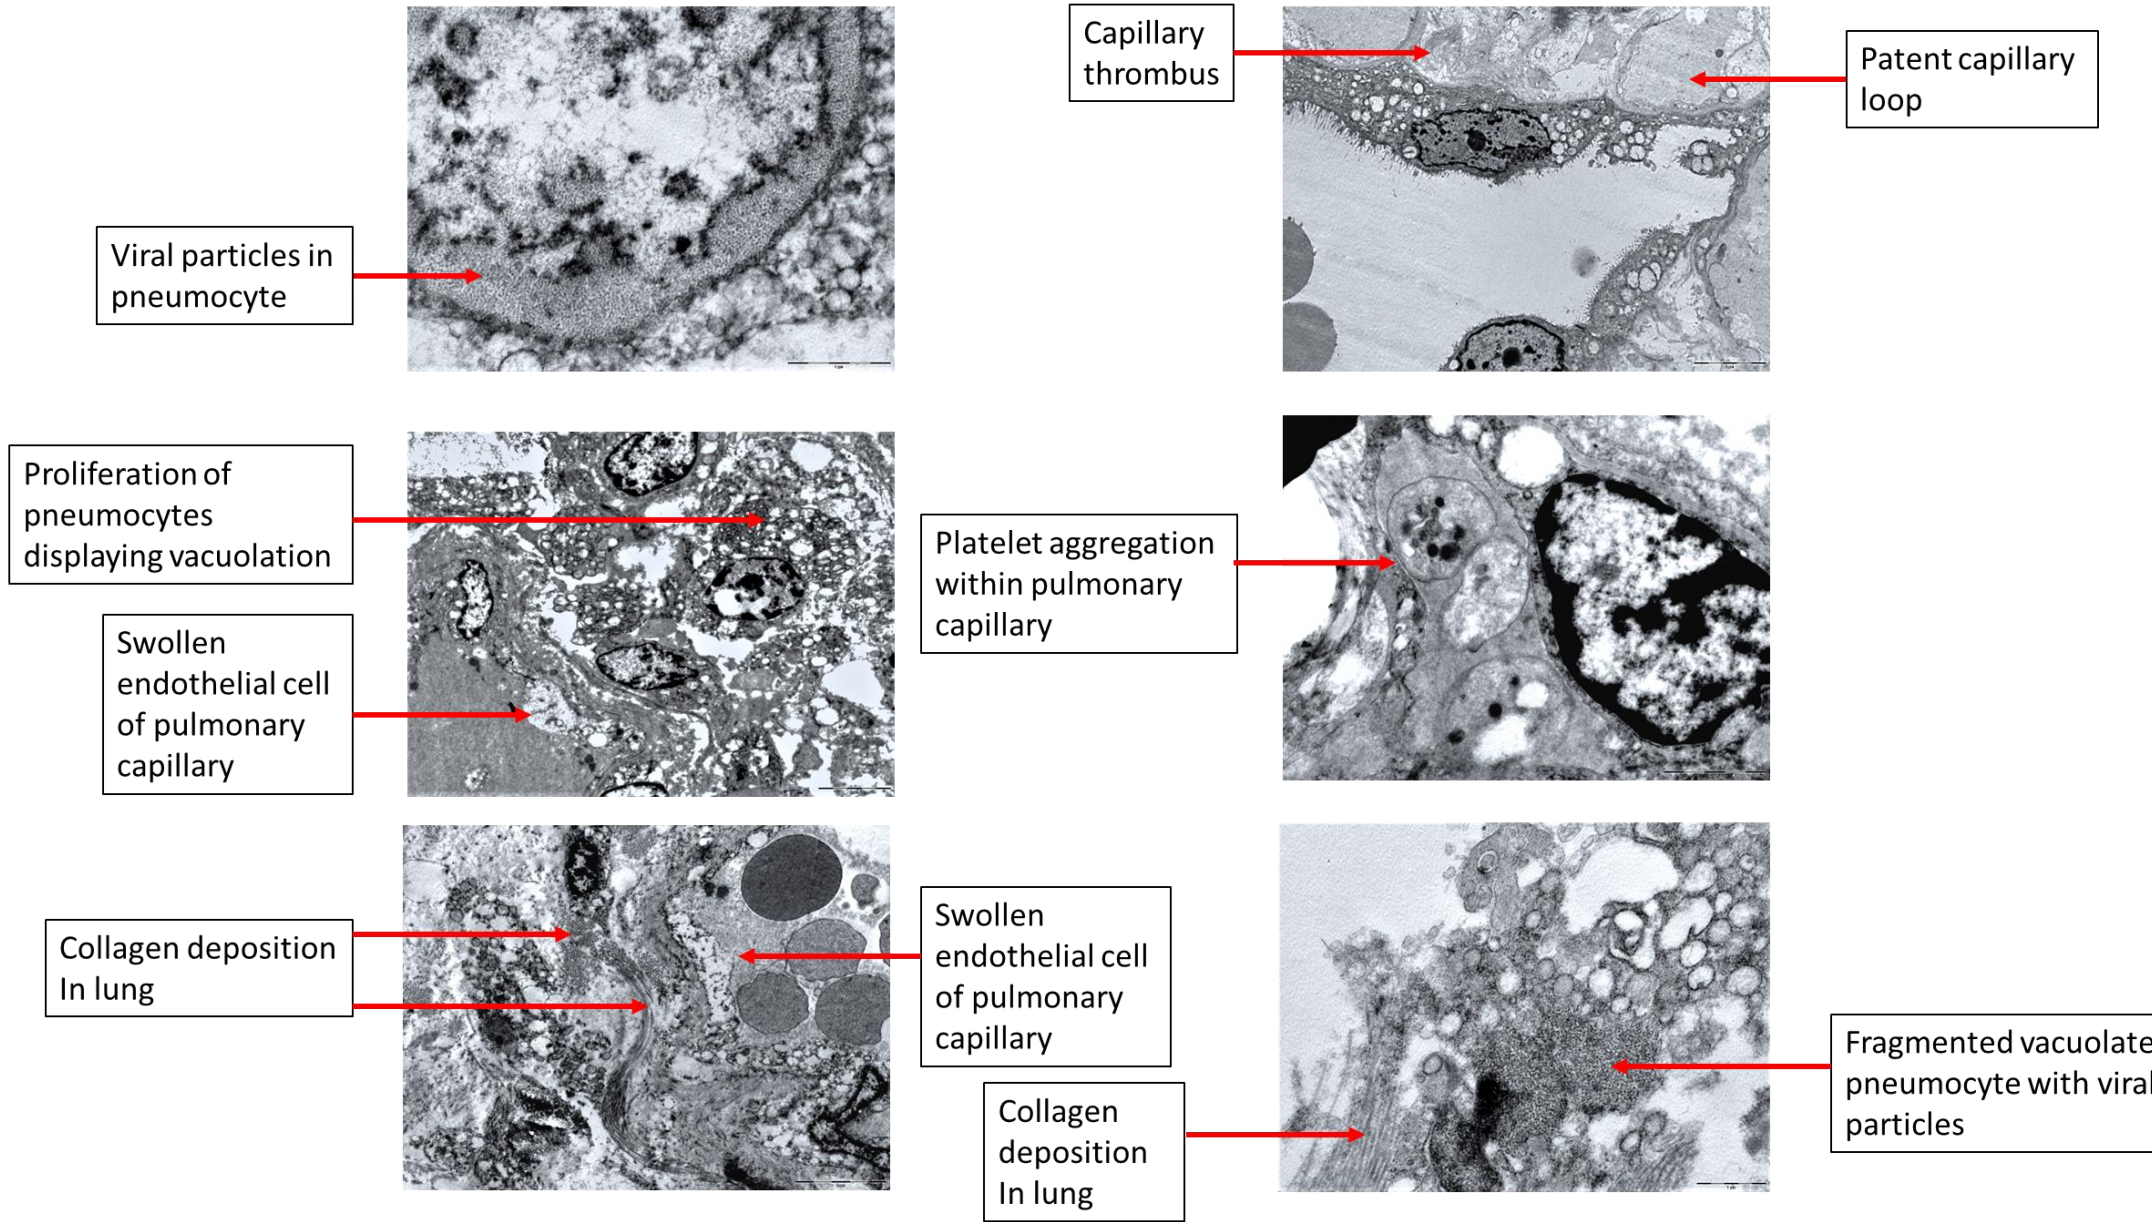

Figure S5. Electron micrographs of key clinical features of lung abnormalities associated with acute COVID-19 disease.

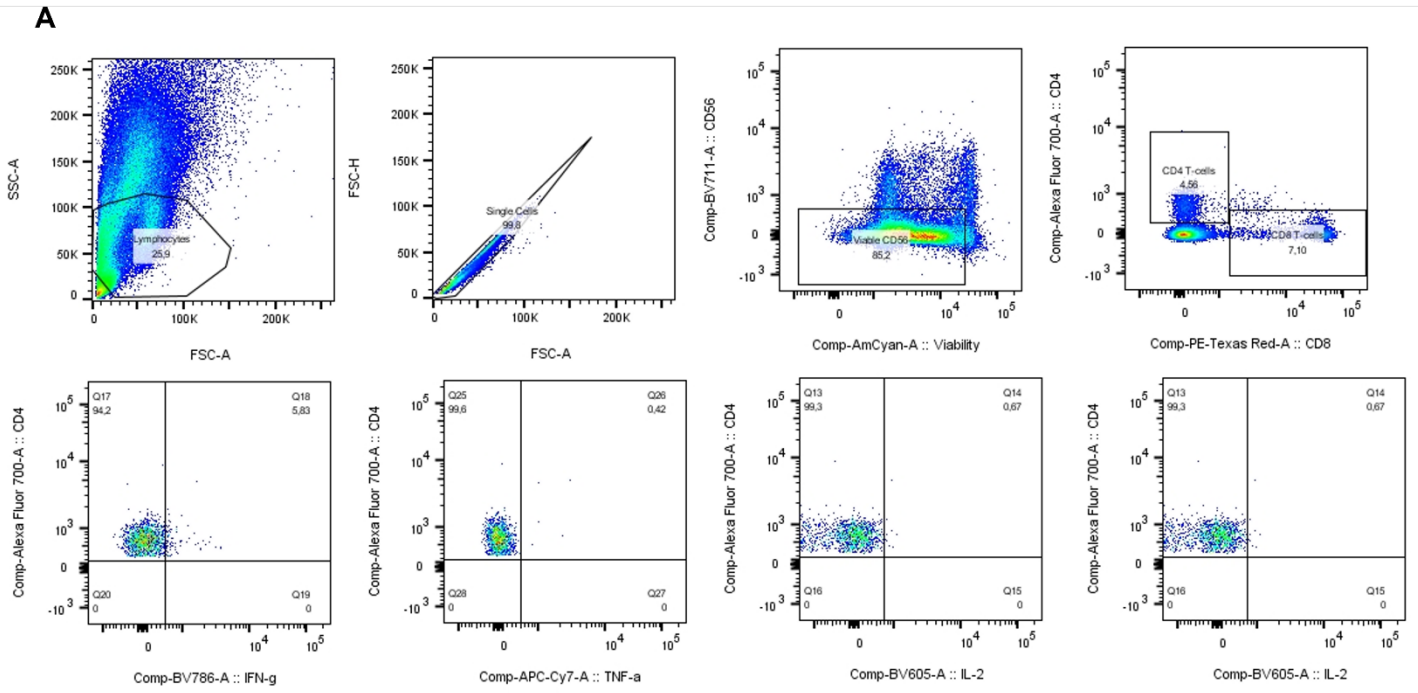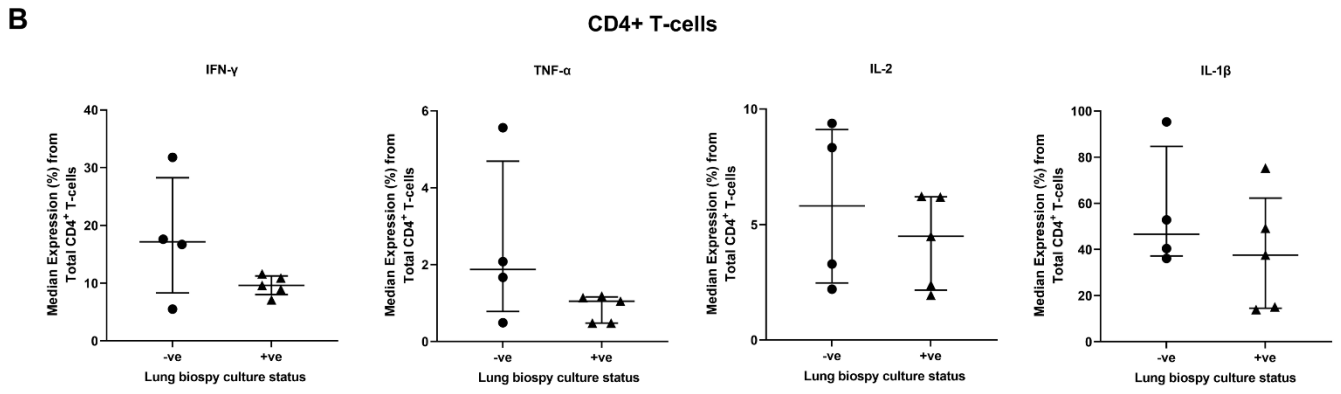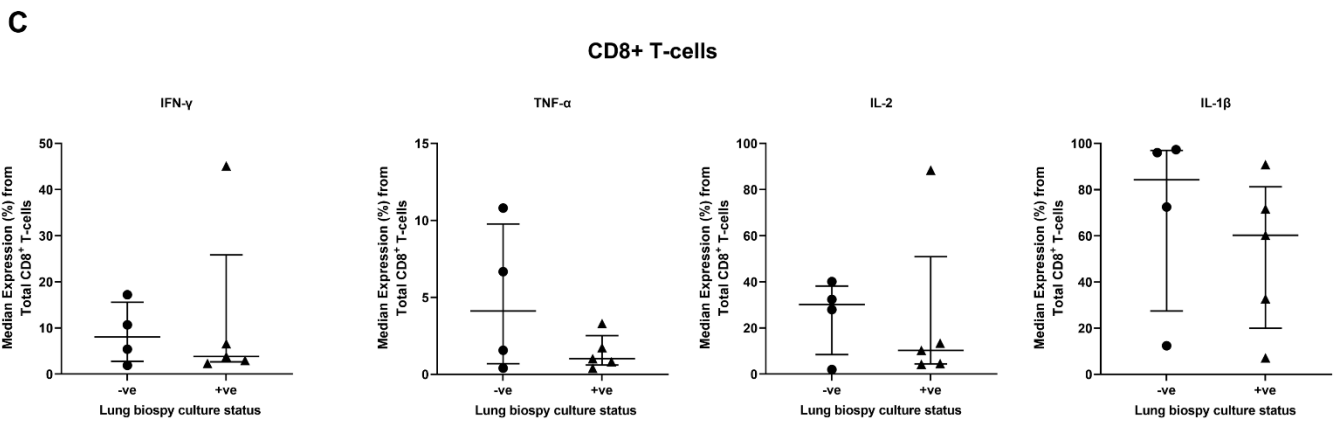

**Figure S6.** Flow cytometry data showing (A) the gating strategy and expression of IFN- $\gamma$ , TNF- $\alpha$ , IL-2 and IL- $\beta$  from CD4+ (B) and CD8+ (C) lung-derived T-cells from the Delta decedents.

**Table S2. Histopathological data of the combined study cohort.**

| Histology Tissue                                            | All patients<br>n=33* | culture-<br>positive<br>patients<br>n=13 | culture-<br>negative<br>patients<br>n=20 | p-value      |
|-------------------------------------------------------------|-----------------------|------------------------------------------|------------------------------------------|--------------|
| <b>LUNG</b>                                                 |                       |                                          |                                          |              |
| Alveolar hyaline membranes                                  | 24/33 (73%)           | 8/13<br>(61.5%)                          | 16/20 (80%)                              | 0.245        |
| Interstitial oedema                                         | 7/19 (37%)            | 3/7 (43%)                                | 4/12 (33%)                               | 0.678        |
| Collapsed alveoli                                           | 9/33 (27%)            | 3/13 (23%)                               | 6/20 (30%)                               | 0.663        |
| Pneumocyte denudation/necrosis                              | 24/33 (73%)           | 9/13<br>(69.2%)                          | 15/20 (75%)                              | 0.716        |
| Endothelial necrosis                                        | 5/19 (26%)            | 3/7 (43%)                                | 2/12 (17%)                               | 0.211        |
| Vascular neutrophil aggregate                               | 6/19 (32%)            | 3/7 (43%)                                | 3/12 (25%)                               | 0.419        |
| Micro-thromboembolic                                        | 11/33 (33%)           | 5/13<br>(38.5%)                          | 6/20 (30%)                               | 0.614        |
| Pulmonary haemorrhage                                       | 14/33 (42%)           | 3/13 (23%)                               | 11/20 (55%)                              | 0.070        |
| Pulmonary endothelialitis                                   | 5/19 (26%)            | 2/7 (29%)                                | 3/12 (25%)                               | 0.865        |
| Organising hyaline membranes                                | 15/19 (79%)           | 6/7 (86%)                                | 9/12 (75%)                               | 0.581        |
| Fibroblasts/myofibroblasts proliferation                    | 16/19 (84%)           | 6/7 (86%)                                | 10/12 (83%)                              | 0.891        |
| Lymphocytic infiltration                                    | 26/33 (79%)           | 9/13<br>(69.2%)                          | 17/20 (85%)                              | 0.279        |
| Plasma cell infiltration                                    | 4/19 (21%)            | 1/7 (14%)                                | 3/12 (25%)                               | 0.581        |
| Type II pneumocytes proliferation                           | 30/33 (91%)           | 10/13<br>(77%)                           | 20/20 (100%)                             | <b>0.024</b> |
| Atypical pneumocytes                                        | 18/19 (95%)           | 7/7 (100%)                               | 11/12 (92%)                              | 0.433        |
| Atypical pneumocyte cytomegaly                              | 25/33 (76%)           | 9/13 (69%)                               | 16/20 (80%)                              | 0.481        |
| Atypical pneumocyte nucleomegaly                            | 21/33 (64%)           | 7/13 (54%)                               | 14/20 (70%)                              | 0.346        |
| Atypical pneumocyte multinucleation                         | 19/33 (58%)           | 6/13 (46%)                               | 13/20 (65%)                              | 0.285        |
| Atypical pneumocyte syncytia                                | 5/33 (15%)            | 3/13 (23%)                               | 2/20 (10%)                               | 0.306        |
| Foamy pneumocytes                                           | 19/19 (100%)          | 7/7 (100%)                               | 12/12 (100%)                             | -            |
| Arterial/arteriole thrombosis                               | 0/19 (0%)             | 0/7 (0%)                                 | 0/12 (0%)                                | -            |
| Diffuse collagenous fibrosis                                | 0/19 (0%)             | 0/7 (0%)                                 | 0/12 (0%)                                | -            |
| Subpleural/interstitial fibrosis                            | 7/19 (37%)            | 2/7 (29%)                                | 5/12 (42%)                               | 0.568        |
| Honeycomb                                                   | 5/33 (15%)            | 2/13<br>(15.4%)                          | 4/20 (20%)                               | 0.737        |
| Traction bronchiectasis                                     | 0/19 (0%)             | 0/7 (0%)                                 | 0/12 (0%)                                | -            |
| Squamous met                                                | 1/19 (5%)             | 1/7 (14%)                                | 0/12 (0%)                                | 0.363        |
| Intimal fibrosis                                            | 0/19 (0%)             | 0/7 (0%)                                 | 0/12 (0%)                                | -            |
| Medial hypertrophy                                          | 0/19 (0%)             | 0/7 (0%)                                 | 0/12 (0%)                                | -            |
| Organising pneumonia                                        | 10/33 (30%)           | 4/13 (31%)                               | 6/20 (30%)                               | 0.963        |
| Bronchopneumonia (neutrophilic infiltrate into the alveoli) | 10/33 (30%)           | 5/13<br>(38.5%)                          | 5/20 (25%)                               | 0.411        |
| Intranuclear inclusions                                     | 0/33 (0%)             | 0/13 (0%)                                | 0/20 (0%)                                | -            |
| Intracytoplasmic inclusions                                 | 0/33 (0%)             | 0/13 (0%)                                | 0/20 (0%)                                | -            |
| Megakaryocytes                                              | 22/33 (68%)           | 8/13 (71%)                               | 14/20 (70%)                              | 0.614        |
| Lung haemophagocytosis (increased alveolar macrophages)     | 17/33 (52%)           | 3/13 (23%)                               | 14/20 (70%)                              | <b>0.008</b> |
| Lung siderophages                                           | 6/33 (18%)            | 2/13<br>(15.4%)                          | 4/20 (20%)                               | 0.737        |
| Necrotising granulomas                                      | 1/33 (3%)             | 1/13 (0%)                                | 0/20 (7.7%)                              | 0.208        |
| Non-necrotising granulomas                                  | 0/33 (0%)             | 0/13(0%)                                 | 0/20 (0%)                                | -            |
| <b>HEART</b>                                                |                       |                                          |                                          |              |
| Isolated myocyte necrosis                                   | 6/33 (18%)            | 1/13 (14%)                               | 5/20 (25%)                               |              |
| Cardiac ischaemia                                           | 8/17 (47%)            | 3/7 (43%)                                | 5/10 (50%)                               | 0.772        |
| Cardiac thrombi                                             | 1/33 (3%)             | 0/13 (0%)                                | 1/20 (5%)                                | 0.413        |
| Card capillary neutrophil margination                       | 0/17 (0%)             | 0/7 (0%)                                 | 0/10 (0%)                                | -            |
| RBC fragment                                                | 0/17 (0%)             | 0/7 (0%)                                 | 0/10 (0%)                                | -            |
| Lipofuscin                                                  | 17/17 (100%)          | 7/7 (100%)                               | 10/10 (100%)                             | -            |
| Enlarged nuclei                                             | 23/33 (70%)           | 10/13<br>(77%)                           | 13/20 (65%)                              | 0.467        |
| Cardiac interstitial fibrosis                               | 20/33 (61%)           | 4/13 (31%)                               | 16/20 (80%)                              | <b>0.005</b> |
| Heart endothelialitis                                       | 1/33 (3%)             | 0/13 (0%)                                | 1/20 (10%)                               | 0.413        |



|                                     |             |                 |             |              |
|-------------------------------------|-------------|-----------------|-------------|--------------|
| Cardiac neutrophils                 | 0/33 (0%)   | 0/13 (0%)       | 0/20 (0%)   | -            |
| Cardiac lymphocytes                 | 5/33 (15%)  | 1/13 (7.7%)     | 4/20 (20%)  | 0.335        |
| Cardiac histiocytes                 | 2/33 (6%)   | 1/13 (7.7%)     | 1/20 (5%)   | 0.752        |
| Cardiac eosinophils                 | 1/33 (3%)   | 0/13 (0%)       | 1/20 (5%)   | 0.413        |
| Cardiac interstitial oedema         | 4/33 (12%)  | 0/13 (0%)       | 4/20 (20%)  | 0.085        |
| <b>LIVER</b>                        |             |                 |             |              |
| Increase Kupffer                    | 16/17 (94%) | 7/7 (100%)      | 9/10 (90%)  | 0.389        |
| Foamy Kupffer                       | 4/17 (24%)  | 1/7 (14%)       | 3/10 (30%)  | 0.452        |
| Liver haemophagocytosis             | 9/33 (27%)  | 4/13 (31%)      | 5/20 (25%)  | 0.716        |
| Liver siderophages                  | 1/33 (3%)   | 0/13 (0%)       | 1/20 (5%)   | 0.413        |
| Liver necrosis                      | 7/17 (41%)  | 3/7 (43%)       | 4/10 (40%)  | 0.906        |
| Spotty necrosis Zone 1              | 0/17 (0%)   | 0/7 (0%)        | 0/10 (0%)   | -            |
| Spotty necrosis zone 2              | 2/16 (13%)  | 1/6 (17%)       | 1/10 (10%)  | 0.696        |
| Spotty necrosis Zone 3              | 2/17 (12%)  | 1/7 (14%)       | 1/10 (10%)  | 0.787        |
| Confluent necrosis zone 1           | 0/17 (0%)   | 0/7 (0%)        | 0/10 (0%)   | -            |
| Confluent necrosis Zone 2           | 1/17 (6%)   | 0/7 (0%)        | 1/10 (10%)  | 0.389        |
| Confluent necrosis Zone 3           | 4/17 (24%)  | 1/7 (14%)       | 3/10 (30%)  | 0.452        |
| Micro steatosis                     | 14/17 (82%) | 6/7 (86%)       | 8/10 (80%)  | 0.761        |
| Macro steatosis                     | 13/17 (76%) | 6/7 (86%)       | 7/10 (70%)  | 0.452        |
| Cholestasis                         | 8/33 (24%)  | 3/13 (23%)      | 5/20 (25%)  | 0.900        |
| Liver inflammation                  | 9/17 (53%)  | 3/7 (43%)       | 6/10 (60%)  | 0.060        |
| Liver regeneration                  | 16/17 (94%) | 7/7 (100%)      | 9/10 (90%)  | 0.389        |
| Liver congestion                    | 9/33 (%)    | 8/13<br>(61.5%) | 11/20 (55%) | 0.710        |
| Liver viral inclusions              | 0/17 (0%)   | 0/7 (0%)        | 0/10 (0%)   | -            |
| Liver fibrosis F1                   | 2/17 (12%)  | 1/7 (14%)       | 1/10 (10%)  | 0.787        |
| Liver fibrosis F2                   | 0/17 (0%)   | 0/7 (0%)        | 0/10 (0%)   | -            |
| Liver fibrosis F3                   | 1/17 (6%)   | 0/7 (0%)        | 1/10 (10%)  | 0.389        |
| Liver fibrosis F4                   | 1/17 (6%)   | 0/7 (0%)        | 1/10 (10%)  | 0.389        |
| Primary sclerosing cholangitis      | 0/17 (0%)   | 0/7 (0%)        | 0/10 (0%)   | -            |
| Primary biliary cholangitis         | 0/17 (0%)   | 0/7 (0%)        | 0/10 (0%)   | -            |
| Extramedullary haematopoiesis (EMH) | 0/17 (0%)   | 0/7 (0%)        | 0/10 (0%)   | -            |
| <b>KIDNEY</b>                       |             |                 |             |              |
| Glom capillary dilatation           | 10/11 (91%) | 5/5 (100%)      | 5/6 (83%)   | 0.338        |
| Glom thrombus                       | 4/11 (36%)  | 0/5 (0%)        | 4/6 (67%)   | <b>0.022</b> |
| Glom sclerosis                      | 3/11 (27%)  | 0/5 (0%)        | 3/6 (50%)   | 0.064        |
| Increase mesangium                  | 7/11 (64%)  | 3/5 (60%)       | 4/6 (67%)   | 0.819        |
| Membrane thickening                 | 0/11 (0%)   | 0/5 (0%)        | 0/6 (0%)    | -            |
| Acute kidney injury                 | 4/11 (36%)  | 0/5 (0%)        | 4/6 (67%)   | <b>0.022</b> |
| Tubular casts                       | 6/11 (55%)  | 2/5 (40%)       | 4/6 (67%)   | 0.377        |
| Isometric vacuole                   | 0/11 (0%)   | 0/5 (0%)        | 0/6 (0%)    | -            |
| Kidney interstitial lymphocytes     | 1/11 (9%)   | 1/5 (20%)       | 0/6 (0%)    | 0.251        |
| Kidney interstitial plasma          | 1/11 (9%)   | 1/5 (20%)       | 0/6 (0%)    | 0.251        |
| Kidney interstitial fibrosis        | 2/11 (18%)  | 0/5 (0%)        | 2/6 (33%)   | 0.154        |
| Kidney interstitial haem            | 0/11 (0%)   | 0/5 (0%)        | 0/6 (0%)    | -            |
| Kidney arteriosclerosis             | 4/11 (36%)  | 1/5 (20%)       | 3/6 (50%)   | 0.064        |
| <b>ADIPOSE</b>                      |             |                 |             |              |
| Fat necrosis                        | 10/21 (48%) | 6/8 (75%)       | 4/13 (31%)  | <b>0.049</b> |
| Fat fibrin                          | 0/21 (0%)   | 0/8 (0%)        | 0/13 (0%)   | -            |
| Fat unremarked                      | 11/21 (52)  | 2/8 (25%)       | 9/13 (69%)  | <b>0.049</b> |

\*Histopathology was not performed on all the biopsy samples.

**Table S3. Electron microscopy data of the Delta cohort.**

| Histology Tissue                  | All patients<br>n=17* | culture-<br>positive<br>patients<br>n=7 | culture-<br>negative<br>patients<br>n=10 | p-value      |
|-----------------------------------|-----------------------|-----------------------------------------|------------------------------------------|--------------|
| <b>LUNG</b>                       |                       |                                         |                                          |              |
| Pneumocyte vacuolation            | 13/17 (76%)           | 6/7 (86%)                               | 7/10 (70%)                               | 0.452        |
| Endothelial vacuolation           | 3/17 (18%)            | 2/7 (29%)                               | 1/10 (10%)                               | 0.323        |
| Endothelial swelling              | 13/17 (76%)           | 6/7 (86%)                               | 7/10 (70%)                               | 0.452        |
| Activated capillary monocytes     | 1/17 (6%)             | 0/7 (0%)                                | 1/10 (10%)                               | 0.389        |
| Pneumocyte detachment             | 15/17 (88%)           | 7/7 (100%)                              | 8/10 (80%)                               | 0.208        |
| Collagen deposits                 | 11/16 (69%)           | 5/6 (83%)                               | 6/10 (60%)                               | 0.330        |
| <b>HEART</b>                      |                       |                                         |                                          |              |
| Mitochondrial hypoxic changes     | 12/12 (100%)          | 6/6 (100%)                              | 6/6 (100%)                               | -            |
| Myocyte atrophy and wrinkling     | 11/11 (100%)          | 6/6 (100%)                              | 5/5 (100%)                               | -            |
| Lipofuscin                        | 7/11 (64%)            | 5/6 (83%)                               | 2/5 (40%)                                | 0.137        |
| Swollen endothelial               | 10/11 (91%)           | 6/6 (100%)                              | 4/5 (80%)                                | 0.251        |
| Fragmented red blood cells        | 4/11 (36%)            | 4/6 (57%)                               | 0/5 (0%)                                 | <b>0.022</b> |
| Myofibrillar disruption           | 5/11 (45%)            | 4/6 (57%)                               | 1/5 (20%)                                | 0.122        |
| <b>LIVER</b>                      |                       |                                         |                                          |              |
| Swollen/hypoxic mitochondria      | 15/15 (100%)          | 6/6 (100%)                              | 9/9 (100%)                               | -            |
| Increased Kupffer                 | 2/15 (13%)            | 1/6 (17%)                               | 1/9 (11%)                                | 0.757        |
| Steatosis                         | 7/15 (47%)            | 2/6 (33%)                               | 5/9 (56%)                                | 0.398        |
| Haemophagocytosis                 | 10/15 (67%)           | 4/6 (57%)                               | 6/9 (67%)                                | 1            |
| Detached of endothelial cells     | 7/15 (47%)            | 3/6 (50%)                               | 4/9 (44%)                                | 0.833        |
| Lipidized stellate cells          | 7/15 (47%)            | 3/6 (50%)                               | 4/9 (44%)                                | 0.833        |
| EM liver cholestasis              | 2/14 (14%)            | 1/6 (17%)                               | 1/8 (13%)                                | 0.826        |
| <b>ADIPOSE</b>                    |                       |                                         |                                          |              |
| Normal mitochondria               | 3/14 (21%)            | 0/6 (0%)                                | 3/8 (38%)                                | 0.091        |
| Slightly enlarged mitochondria    | 5/14 (36%)            | 4/6 (57%)                               | 1/8 (13%)                                | <b>0.036</b> |
| Enlarged mitochondria             | 6/14 (43%)            | 2/6 (33%)                               | 4/8 (50%)                                | 0.533        |
| Swollen endothelial cells present | 9/11 (82%)            | 4/4 (100%)                              | 5/7 (71%)                                | 0.237        |

\*EM was only performed on biopsy samples in the Delta cohort.

**A**

PCA plot: 97% of variability separated by culture status

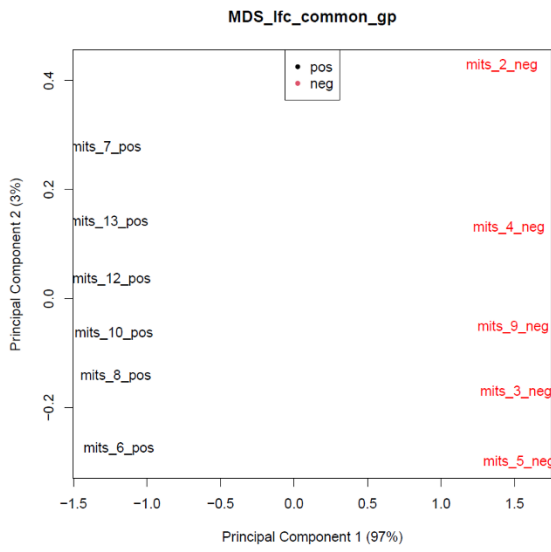**B**

Heatmap of differentially regulated genes cluster by lung culture status

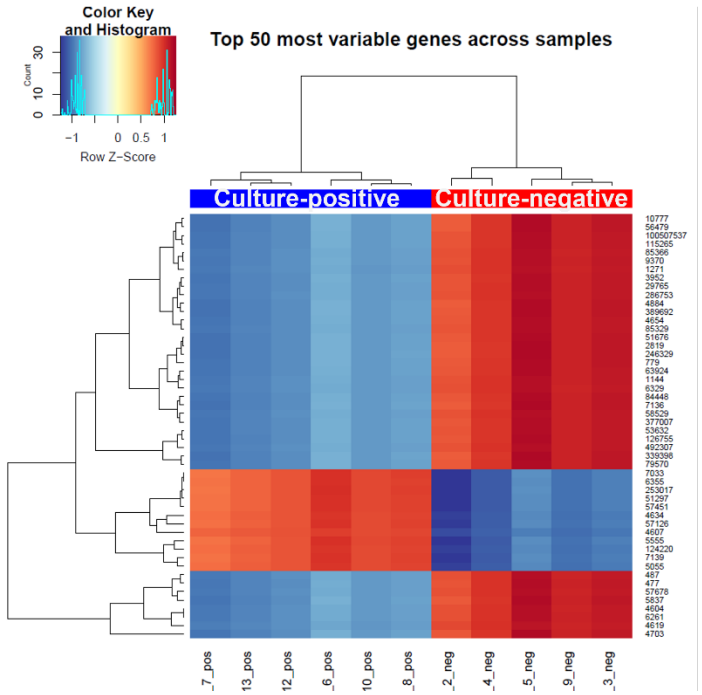

**Figure S7. Gene expression profile in the culture-negative and culture-positive groups cluster into distinct groups. PCA plot (A) and heatmap (B) showing that distinct genes are differentially regulated in the culture-positive and culture-negative groups.**

**Table S4. Whole genome sequencing results of the viral variants from the study cohort.** Only 6 culture-negative and 6 culture-positive samples were available for sequencing because either the viral load was too low ( $C_t > 30$ ) or the sample was not available. It was therefore impossible to perform comparative analysis between the 2 groups because of the small sample number. Data was analysed and sequences aligned using the Stanford University Coronavirus Antiviral and Resistance Database (available at: <https://covdb.stanford.edu/>)

| Patient ID* | Source of sample         | Variant | Lineage | Sub-lineage | Gene                         | Unique mutations (found in <0.01% of genomes) | Comments                                                                                       | Ref          |
|-------------|--------------------------|---------|---------|-------------|------------------------------|-----------------------------------------------|------------------------------------------------------------------------------------------------|--------------|
| WITS 1210   | Lung culture supernatant | Beta    | 20B     | B.1.1       | -                            | None                                          |                                                                                                |              |
| WITS 12068  | Lung culture supernatant | Beta    | 20H     | B.1.3.51    | -                            | None                                          |                                                                                                |              |
| WITS 12115  | Lung culture supernatant | Beta    | 20H     | B.1.351     | -                            | None                                          |                                                                                                |              |
| UCT 001     | NPS                      | Alpha   | 20I     | B1.1.7      | -                            | None                                          |                                                                                                |              |
| UCT 004     | NPS                      | Beta    | 20H     | B1.351      |                              |                                               |                                                                                                |              |
| UCT 028     | NPS                      | Delta   | 21J     | AY6         | -                            | None                                          |                                                                                                |              |
| UCT 016     | NPS                      | Delta   | 21J     | AY91        |                              |                                               |                                                                                                |              |
| UCT 008     | NPS                      | Delta   | 21J     | AY32        | Papain-like protease (PLpro) | C55C*W<br>E113EAGV<br>E115ED<br>C118C*W       |                                                                                                |              |
|             |                          |         |         |             | Helicase (nsp13)             | P593DE<br>R594X                               |                                                                                                |              |
|             |                          |         |         |             | mRNA capping protein (nsp14) | K433KN<br>P443PAST<br>K469KMRT<br>A471APST    |                                                                                                |              |
|             |                          |         |         |             | Membrane (M)                 | S211R<br>S212*DEHQ<br>Y<br>S213X              |                                                                                                |              |
| UCT 012     | NPS                      | Delta   | 21J     | AY32        | -                            | None                                          |                                                                                                |              |
| UCT 018     | NPS                      | Delta   | 21J     | B1.617.2    | Main protease (PLpro)        | A191T                                         | A191T is a reported resistance mutation against 3C-like protease inhibitor, i.e. nirmatrelvir. | <sup>8</sup> |
|             |                          |         |         |             | RdRP                         | H650N                                         |                                                                                                |              |
|             |                          |         |         |             | Spike                        | V16VFIL<br>K77E                               |                                                                                                |              |
|             |                          |         |         |             | Nucleocapsid                 | S255A                                         |                                                                                                |              |
| UCT 022     | NPS                      | Delta   | 21J     | AY32        | -                            | Sequence missing                              |                                                                                                |              |



|                |     |       |     |     |                              |                                  |  |  |
|----------------|-----|-------|-----|-----|------------------------------|----------------------------------|--|--|
| <b>UCT 024</b> | NPS | Delta | 21J | AY6 | Main protease (PLpro)        | N1454NIST                        |  |  |
|                |     |       |     |     | Helicase (nsp13)             | F587L<br>T588TIR                 |  |  |
|                |     |       |     |     | mRNA capping protein (nsp14) | M72X<br>R485DE<br>H486X<br>H487X |  |  |
|                |     |       |     |     | Accessory protein (ORF3a)    | K21R<br>D22D*EHQY<br>L94LV       |  |  |

**Table S5. Transcriptomic analysis showing genes upregulated in the culture-positive cohort relative to the culture-negative cohort.**

| ENZ_ID | Abbreviation | Gene name                                                                        | logFC | logCPM | p value  | FDR   |
|--------|--------------|----------------------------------------------------------------------------------|-------|--------|----------|-------|
| 26585  | GREM1        | Gremlin 1, DAN family BMP antagonist                                             | 3.05  | 5.43   | 1.99E-06 | 0.032 |
| 27111  | SDCBP2       | Syndecan binding protein 2                                                       | 1.67  | 3.38   | 6.06E-06 | 0.032 |
| 374    | AREG         | Amphiregulin                                                                     | 2.10  | 4.96   | 9.19E-06 | 0.032 |
| 5055   | SERPINB2     | Serpin family B member 2                                                         | 4.43  | 2.50   | 1.07E-05 | 0.032 |
| 771    | CA12         | Carbonic anhydrase 12                                                            | 2.10  | 5.34   | 1.22E-05 | 0.032 |
| 134285 | TMEM171      | Transmembrane protein 171                                                        | 2.22  | -0.55  | 1.28E-05 | 0.032 |
| 9982   | FGFBP1       | Fibroblast growth factor binding protein 1                                       | 2.65  | 2.07   | 1.63E-05 | 0.032 |
| 338328 | GPIHBP1      | Glycosylphosphatidylinositol anchored high density lipoprotein binding protein 1 | -2.25 | 2.63   | 1.65E-05 | 0.032 |
| 80320  | SP6          | Sp6 transcription factor                                                         | 1.67  | 1.80   | 1.88E-05 | 0.032 |
| 1E+08  | RASA4B       | RAS p21 protein activator 4B                                                     | -2.81 | 2.91   | 2.00E-05 | 0.032 |
| 1E+08  | FAM225B      | Family with sequence similarity 225 member B (non-protein coding)                | -2.35 | -1.23  | 2.08E-05 | 0.032 |
| 1847   | DUSP5        | Dual specificity phosphatase 5                                                   | 1.95  | 5.27   | 2.29E-05 | 0.032 |
| 57126  | CD177        | CD177 molecule                                                                   | 4.15  | 5.53   | 2.80E-05 | 0.034 |
| 2537   | IFI6         | Interferon alpha inducible protein 6                                             | 2.22  | 7.36   | 2.86E-05 | 0.034 |
| 4915   | NTRK2        | Neurotrophic receptor tyrosine kinase 2                                          | -2.44 | 4.68   | 4.73E-05 | 0.050 |
| 3172   | HNF4A        | Hepatocyte nuclear factor 4 alpha                                                | -2.44 | -0.75  | 4.74E-05 | 0.050 |
| 6853   | SYN1         | Synapsin I                                                                       | 1.95  | 2.27   | 6.03E-05 | 0.060 |
| 22943  | DKK1         | Dickkopf WNT signalling pathway inhibitor 1                                      | 3.06  | 2.75   | 7.50E-05 | 0.068 |
| 2827   | GPR3         | G protein-coupled receptor 3                                                     | 2.07  | 0.53   | 7.63E-05 | 0.068 |
| 6355   | CCL8         | C-C motif chemokine ligand 8                                                     | 3.65  | 4.38   | 8.74E-05 | 0.069 |

**Table S6A. Pathways upregulated in the culture-positive cohort relative to the culture-negative cohort.**

| GO.ID      | Pathway                | Total number of genes associated with the pathway | Enrichment score | NES         | p value  | FDR      |
|------------|------------------------|---------------------------------------------------|------------------|-------------|----------|----------|
| GO:0045087 | Innate immune response | 644                                               | 0,462041652      | 2,23077102  | 3,19E-26 | 1,95E-22 |
| GO:0009617 | Response to bacterium  | 502                                               | 0,436586937      | 2,063633461 | 1,46E-16 | 2,30E-13 |
| GO:0006954 | Inflammatory response  | 666                                               | 0,397117204      | 1,910719799 | 1,84E-16 | 2,30E-13 |
| GO:0009615 | Response to virus      | 337                                               | 0,482017466      | 2,192737214 | 4,76E-16 | 4,15E-13 |
| GO:0034097 | Response to cytokine   | 784                                               | 0,378837973      | 1,853887449 | 4,57E-16 | 4,15E-13 |

|            |                                          |     |             |             |          |          |
|------------|------------------------------------------|-----|-------------|-------------|----------|----------|
| GO:0042742 | Defence response to bacterium            | 187 | 0,57065003  | 2,468893487 | 2,87E-15 | 1,95E-12 |
| GO:0097529 | Myeloid leukocyte migration              | 197 | 0,560938069 | 2,429088511 | 7,89E-15 | 4,82E-12 |
| GO:0071345 | Cellular response to cytokine stimulus   | 700 | 0,379135852 | 1,832624826 | 1,29E-14 | 7,19E-12 |
| GO:0060326 | Cell chemotaxis                          | 260 | 0,505415546 | 2,244480472 | 3,87E-14 | 1,69E-11 |
| GO:0030595 | Leukocyte chemotaxis                     | 199 | 0,543874673 | 2,355877738 | 7,37E-14 | 2,81E-11 |
| GO:1903047 | Mitotic cell cycle process               | 679 | 0,37365134  | 1,802308085 | 9,44E-14 | 3,39E-11 |
| GO:0042330 | Taxis                                    | 521 | 0,406071568 | 1,918906559 | 1,71E-13 | 5,80E-11 |
| GO:0050900 | Leukocyte migration                      | 334 | 0,461740475 | 2,094951262 | 1,90E-13 | 6,01E-11 |
| GO:0006935 | Chemotaxis                               | 519 | 0,406436107 | 1,934745764 | 1,97E-13 | 6,01E-11 |
| GO:0000280 | Nuclear division                         | 380 | 0,433965649 | 1,999760733 | 8,85E-13 | 2,35E-10 |
| GO:0019221 | Cytokine-mediated signalling pathway     | 401 | 0,424428923 | 1,972848247 | 2,15E-12 | 5,46E-10 |
| GO:0007059 | Chromosome segregation                   | 305 | 0,457222273 | 2,071558403 | 2,72E-12 | 6,65E-10 |
| GO:0051301 | Cell division                            | 573 | 0,383696506 | 1,825281074 | 3,41E-12 | 7,87E-10 |
| GO:2000147 | Positive regulation of cell motility     | 507 | 0,386349508 | 1,825320536 | 7,25E-12 | 1,53E-09 |
| GO:0002237 | Response to molecule of bacterial origin | 294 | 0,453670477 | 2,036098196 | 1,01E-11 | 2,05E-09 |

**Table S6B. Other pathways of interest upregulated in the culture-positive cohort relative to the culture-negative cohort.**

| GO.ID      | Pathway                                                  | Total number of genes associated with the pathway | Enrichment score | NES         | FDR      |
|------------|----------------------------------------------------------|---------------------------------------------------|------------------|-------------|----------|
| GO:04657   | IL-17 signalling pathway                                 | 81                                                | 0,635892         | 2.380892    | 1,53E-07 |
| GO:0002456 | T-cell-mediated immunity                                 | 96                                                | 0,478752825      | 1,850434828 | 1,1E-03  |
| GO:0002825 | Regulation of T-helper 1 type immune response            | 25                                                | 0,576145234      | 1,920646442 | 1,2E-3   |
| GO:0035710 | CD4-positive, alpha-beta T cell activation               | 89                                                | 0,470392439      | 1,801972021 | 2,1E-03  |
| GO:0035743 | CD4-positive, alpha-beta T cell cytokine production      | 15                                                | 0,774743052      | 2,055120611 | 3E-03    |
| GO:0002726 | Positive regulation of T cell cytokine production        | 24                                                | 0,683190625      | 2,000311209 | 3,4E-03  |
| GO:0042110 | T cell activation                                        | 448                                               | 0,294698908      | 1,379497641 | 3,5E-03  |
| GO:2000514 | Regulation of CD4-positive, alpha-beta T cell activation | 56                                                | 0,519437379      | 1,853870959 | 5,8-03   |
| GO:0002711 | Positive regulation of T cell mediated immunity          | 49                                                | 0,543959461      | 1,869533223 | 6,7E-3   |
| GO:0042088 | Th1 immune response                                      | 41                                                | 0,576145234      | 1,920646442 | 6,7E-03  |
| GO:0002709 | Regulation of T-cell mediated immunity                   | 76                                                | 0,686930834      | 2,050809398 | 7,3E-03  |

|            |                                          |     |             |            |         |
|------------|------------------------------------------|-----|-------------|------------|---------|
| GO:0002369 | T-cell cytokine production               | 34  | 0,610833263 | 1,94794025 | 9,1E-3  |
| GO:0002724 | Regulation of T cell cytokine production | 34  | 0,610833263 | 1,94794025 | 9,1E-03 |
| GO:0050868 | Negative regulation of T cell activation | 109 | 0,413862853 | 1,63976229 | 1,1E-02 |

**Table S6C. Genes associated with regulatory pathways of are not up- or downregulated in the culture-positive cohort relative to the culture-negative cohort.**

| ENZ ID | Gene   | LogFC        | p-value     | FDR         |
|--------|--------|--------------|-------------|-------------|
| 5133   | PD-1   | -0,580384672 | 0,352556526 | 0,875617669 |
| 64115  | VISTA  | 0,195588418  | 0,601343382 | 0,941688131 |
| 84868  | TIM-3  | 0,243920799  | 0,568480759 | 0,936258857 |
| 1493   | CTLA-4 | 0,100226405  | 0,868488938 | 0,987403587 |
| 940    | CD28   | -0,515589978 | 0,192859859 | 0,773804865 |
| 945    | CD33   | -0,047967186 | 0,910411079 | 0,991670954 |
| 3559   | CD25   | -0,703108858 | 0,154569866 | 0,728675358 |
| 50943  | FOXP3  | -0,918764993 | 0,158003877 | 0,732211968 |

### Supplementary results pertaining to the transcriptomic analysis.

We obtained lung biopsy samples within ~2hrs postmortem to preserve the transcriptional signature. This is well within the postmortem interval (PMI) reported to preserve RNA stability and integrity in the lung <sup>1-3</sup>. One study reported that RNA stability could be preserved after a PMI as long as 41hrs <sup>1</sup>. The lung-culture-positive group express higher levels of carbonic anhydrase 12 (CA12) than the lung culture-negative group (Figure 5, S8 and Table S5). This protein induces a phenotype similar to high-altitude pulmonary oedema with a decreased ratio of arterial oxygen, partial pressure to fractional inspired oxygen, and a reduction of the carbon dioxide levels. This was associated increased tachypnoea and fibrinogen levels/fibrin formation and the presence of hypoxia leading to ARDS.

Another gene that was highly overexpressed in the culture-positive cohort was CD177, a glycosylphosphatidylinositol (GPI)-anchored protein expressed by neutrophils. CD177 plays a key role in neutrophil activation, transmigration and adhesion to the endothelium and are associated with the severity of Covid-19 disease <sup>4</sup> (Figure 5, S8 and Table S5). Fu et al <sup>5</sup> reported that neutrophil chemotaxis, infiltration of endothelial cells, and extravasation into alveolar spaces have been described in lung autopsies from deceased patients with COVID-19 <sup>6</sup>. CD177 was recently identified by proteomics in bronchoalveolar lavage of COVID-19 patients <sup>6</sup> which supports our data of an upregulation of CD177 in our

decedents. Our histopathological data support these findings where we show that the lung culture-positive group have higher infiltration of neutrophils into the alveoli than the lung-culture negative group.

Syndecan binding protein 2 was significantly upregulated in the culture-positive versus the culture-negative group (Figure 5, S8 and Table S5). The protein is a family member of the syndecans (SDC) which are transmembrane proteoglycans that facilitate the cellular entry of SARS-CoV-2 <sup>7</sup>. Endothelial cells express SDC2 and during virus internalization, syndecans colocalize with ACE2, suggesting a jointly shared internalization pathway. Hudak et al <sup>7</sup> reported that entry via SDCs enabled efficient gene transduction with SARS-CoV-2 pseudovirus which implied that SDC-mediated internalisation pathway maintained the viral particles biological activity. Viruses that target SDCs in the lung may therefore interfere with SDC-dependent signalling as inhibitors to both ACE2 and syndecan reduced the cellular entry of SARS-CoV-2, thus supporting the complex nature of internalization.

The culture-positive group, compared to the culture-negative group, are associated with the enrichment of inflammatory, innate immune and enhanced SARS-CoV-2 entry pathways

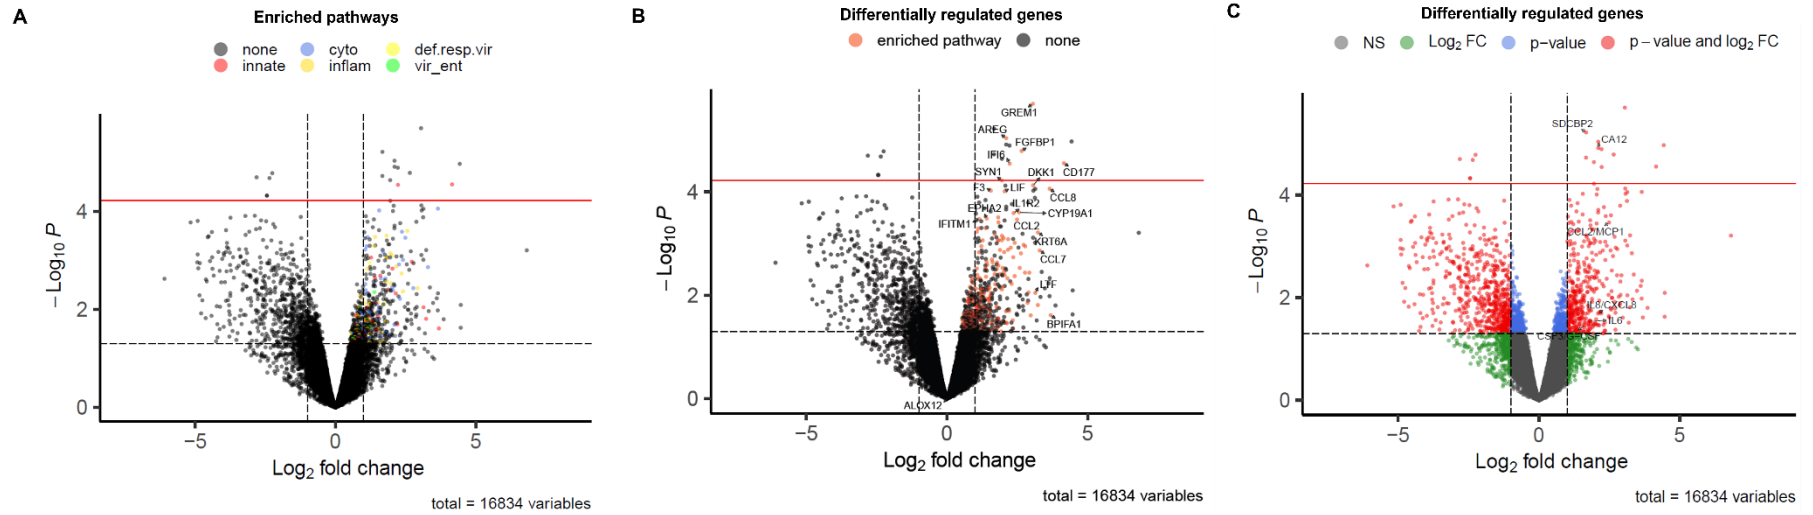

**Figure S8. The culture-positive group expressed higher levels of genes associated with inflammatory, innate immunity and enhanced SARS-CoV-2 cellular entry pathways compared to the culture-negative cohort.** Volcano plots showing the pathways (A) and individual genes (B and C) upregulated in the culture-positive versus the culture-negative cohort. Gene expression profile of individual genes upregulated in the cytokine signalling (D), innate immune (E) and enhanced SARS-CoV-2 cellular entry (F) pathways in the culture-positive versus culture-negative cohort. Cyto = cytokine signalling, def. resp.virus = defence of respiratory virus, innate = innate immunology, inflam = inflammatory response, vir\_ent=viral entry. The red line represents FDR<0.05 and the black dotted









ECM-RECEPTOR INTERACTION

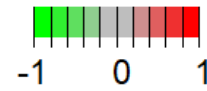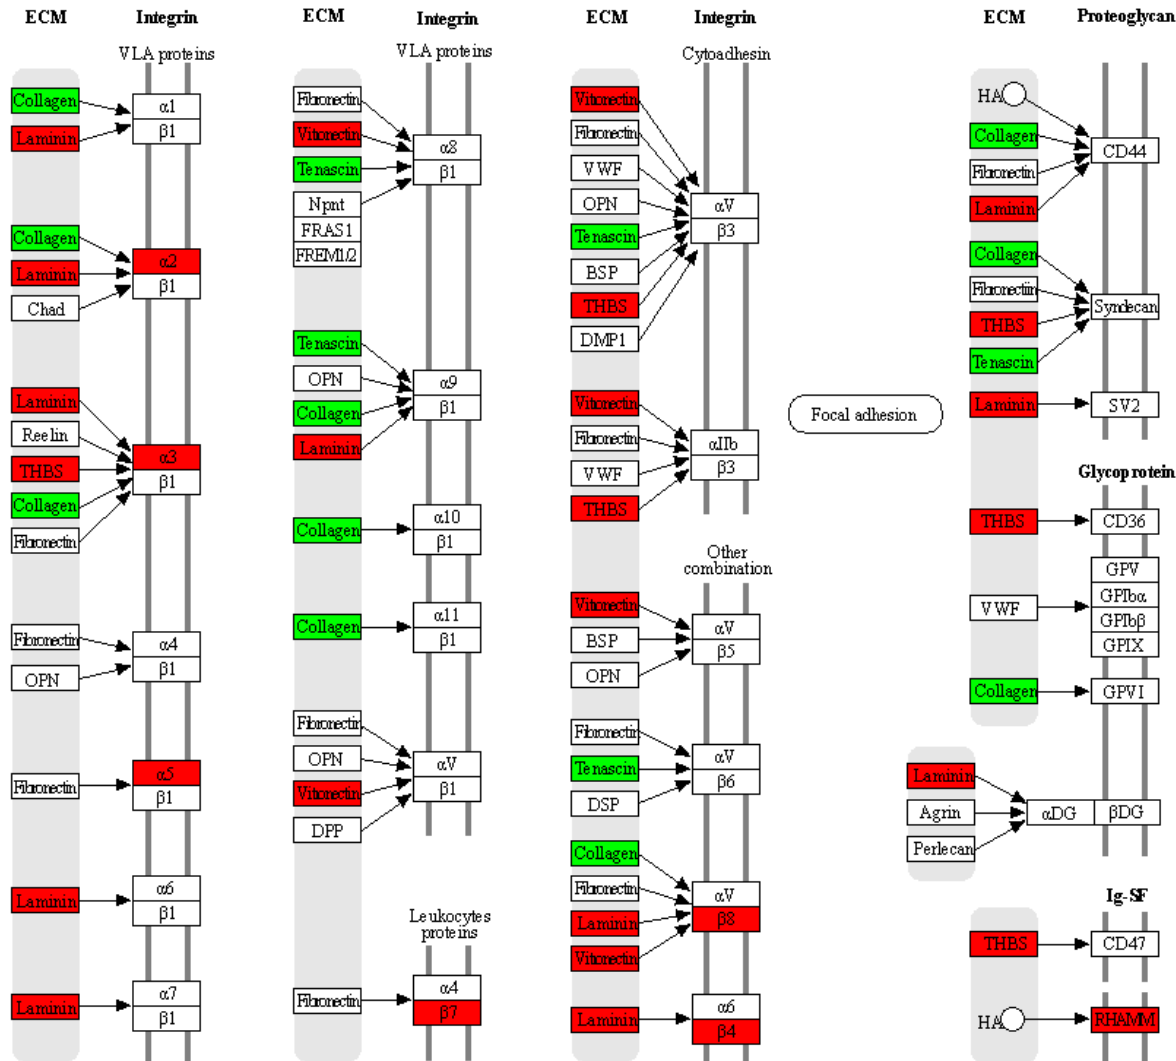

Data on KEGG graph  
Rendered by Pathview

IL-17 SIGNALING PATHWAY

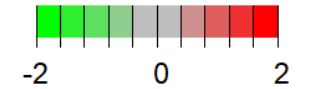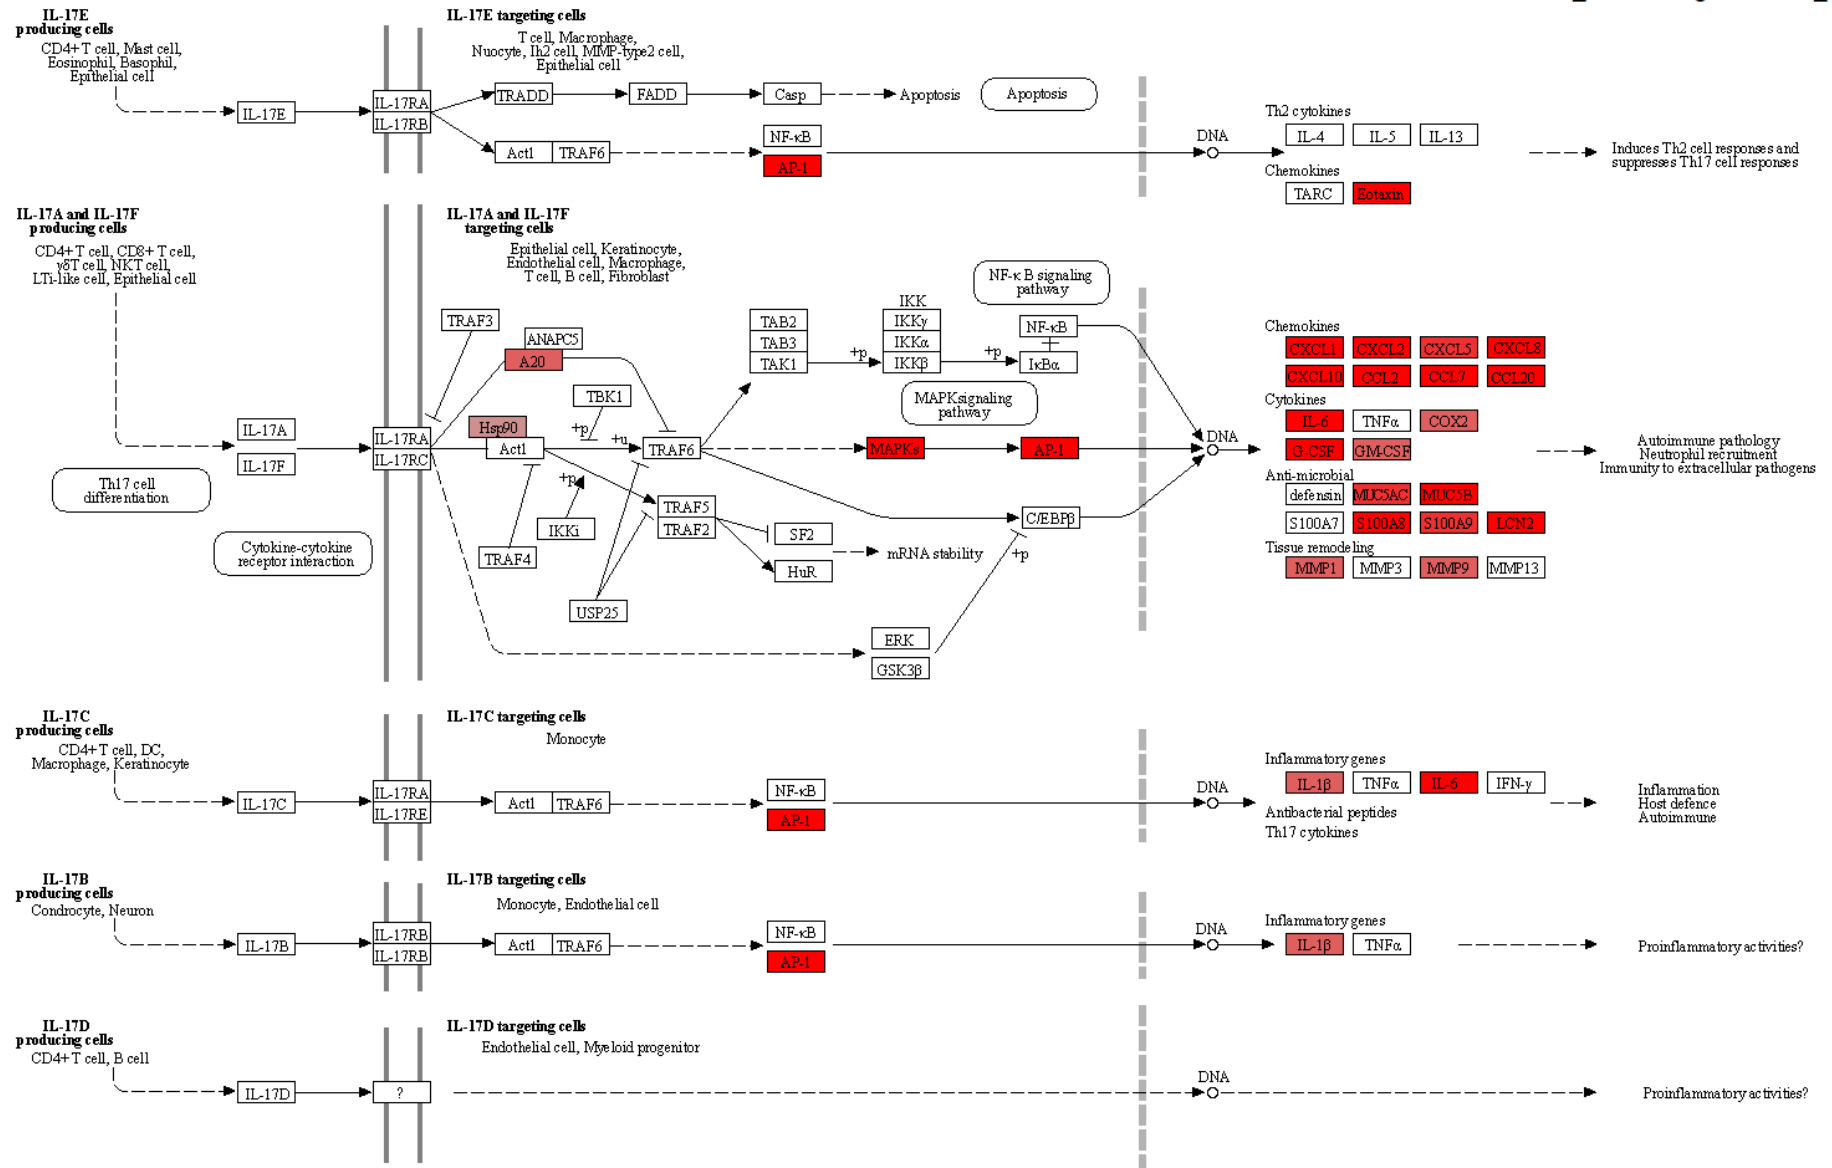

TNF SIGNALING PATHWAY

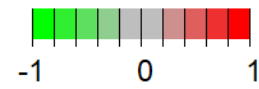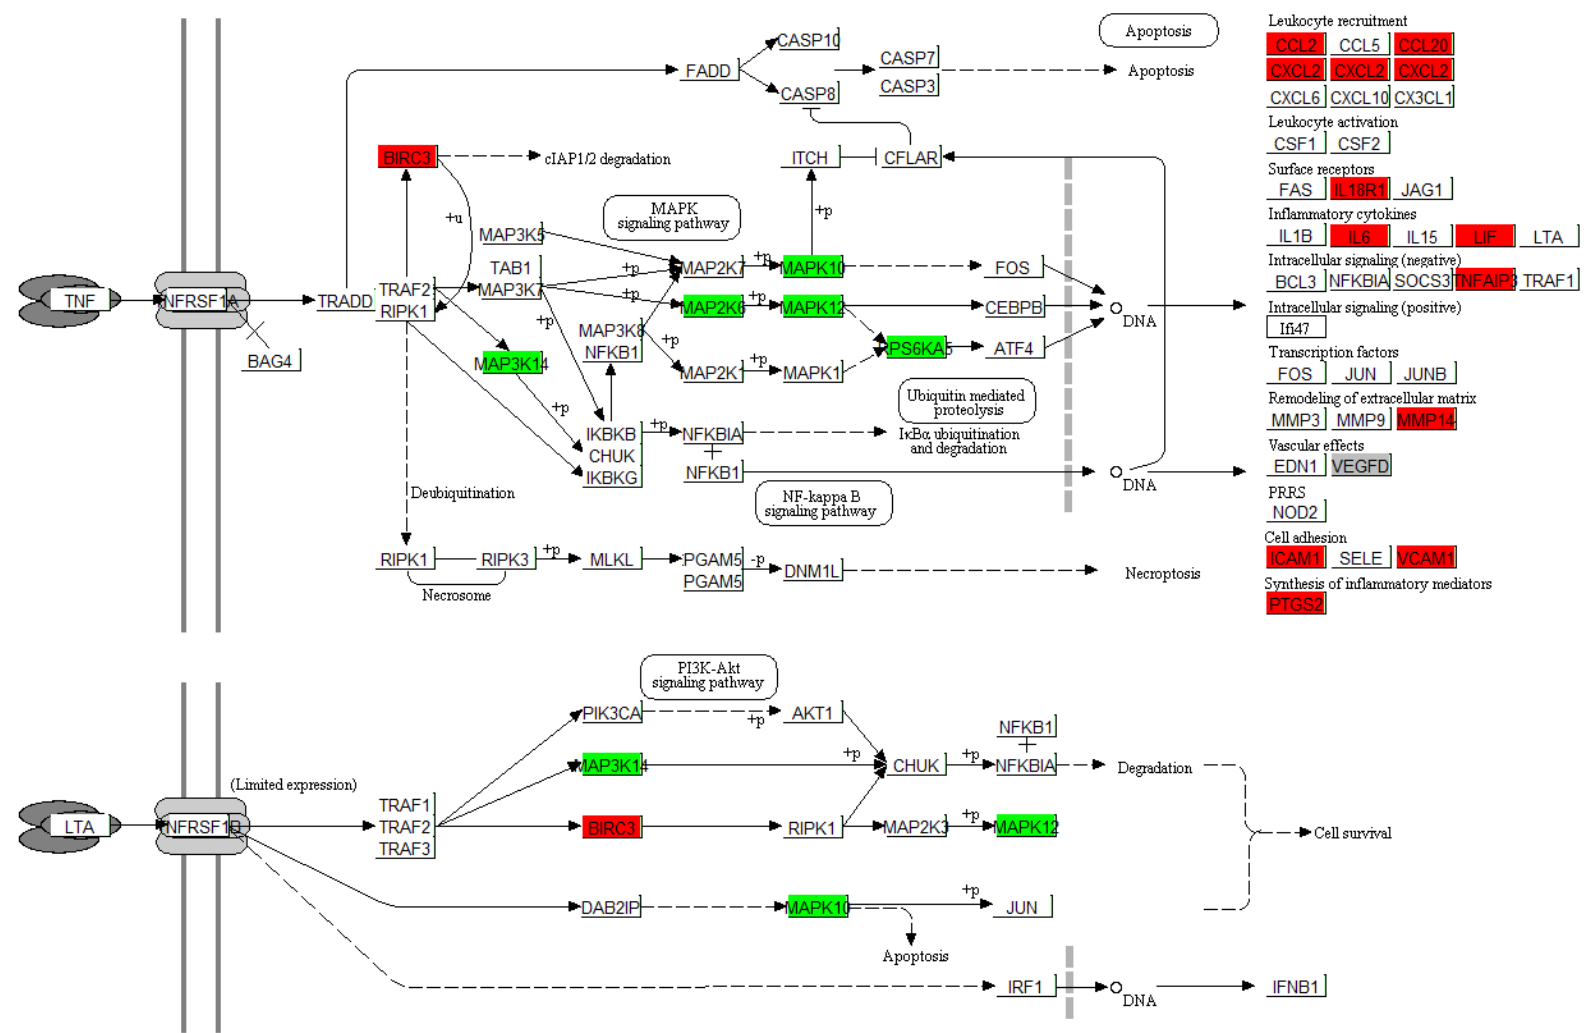

- Leukocyte recruitment
  - CCL2, CCL5, CCL20
  - CXCL2, CXCL2, CXCL2
  - CXCL6, CXCL10, CX3CL1
- Leukocyte activation
  - CSF1, CSF2
- Surface receptors
  - FAS, L18R4, JAG1
- Inflammatory cytokines
  - IL1B, IL6, IL15, LIF, LTA
- Intracellular signaling (negative)
  - BCL3, NFKBIA, SOCS3, NFAIF3, TRAF1
- Intracellular signaling (positive)
  - Ifi47
- Transcription factors
  - FOS, JUN, JUNB
- Remodeling of extracellular matrix
  - MMP3, MMP9, MMP14
- Vascular effects
  - EDN1, VEGFD
- PRRS
  - NOD2
- Cell adhesion
  - ICAM1, SELE, VCAM1
- Synthesis of inflammatory mediators
  - PTGS2

# HUMAN T-CELL LEUKEMIA VIRUS 1 INFECTION

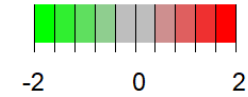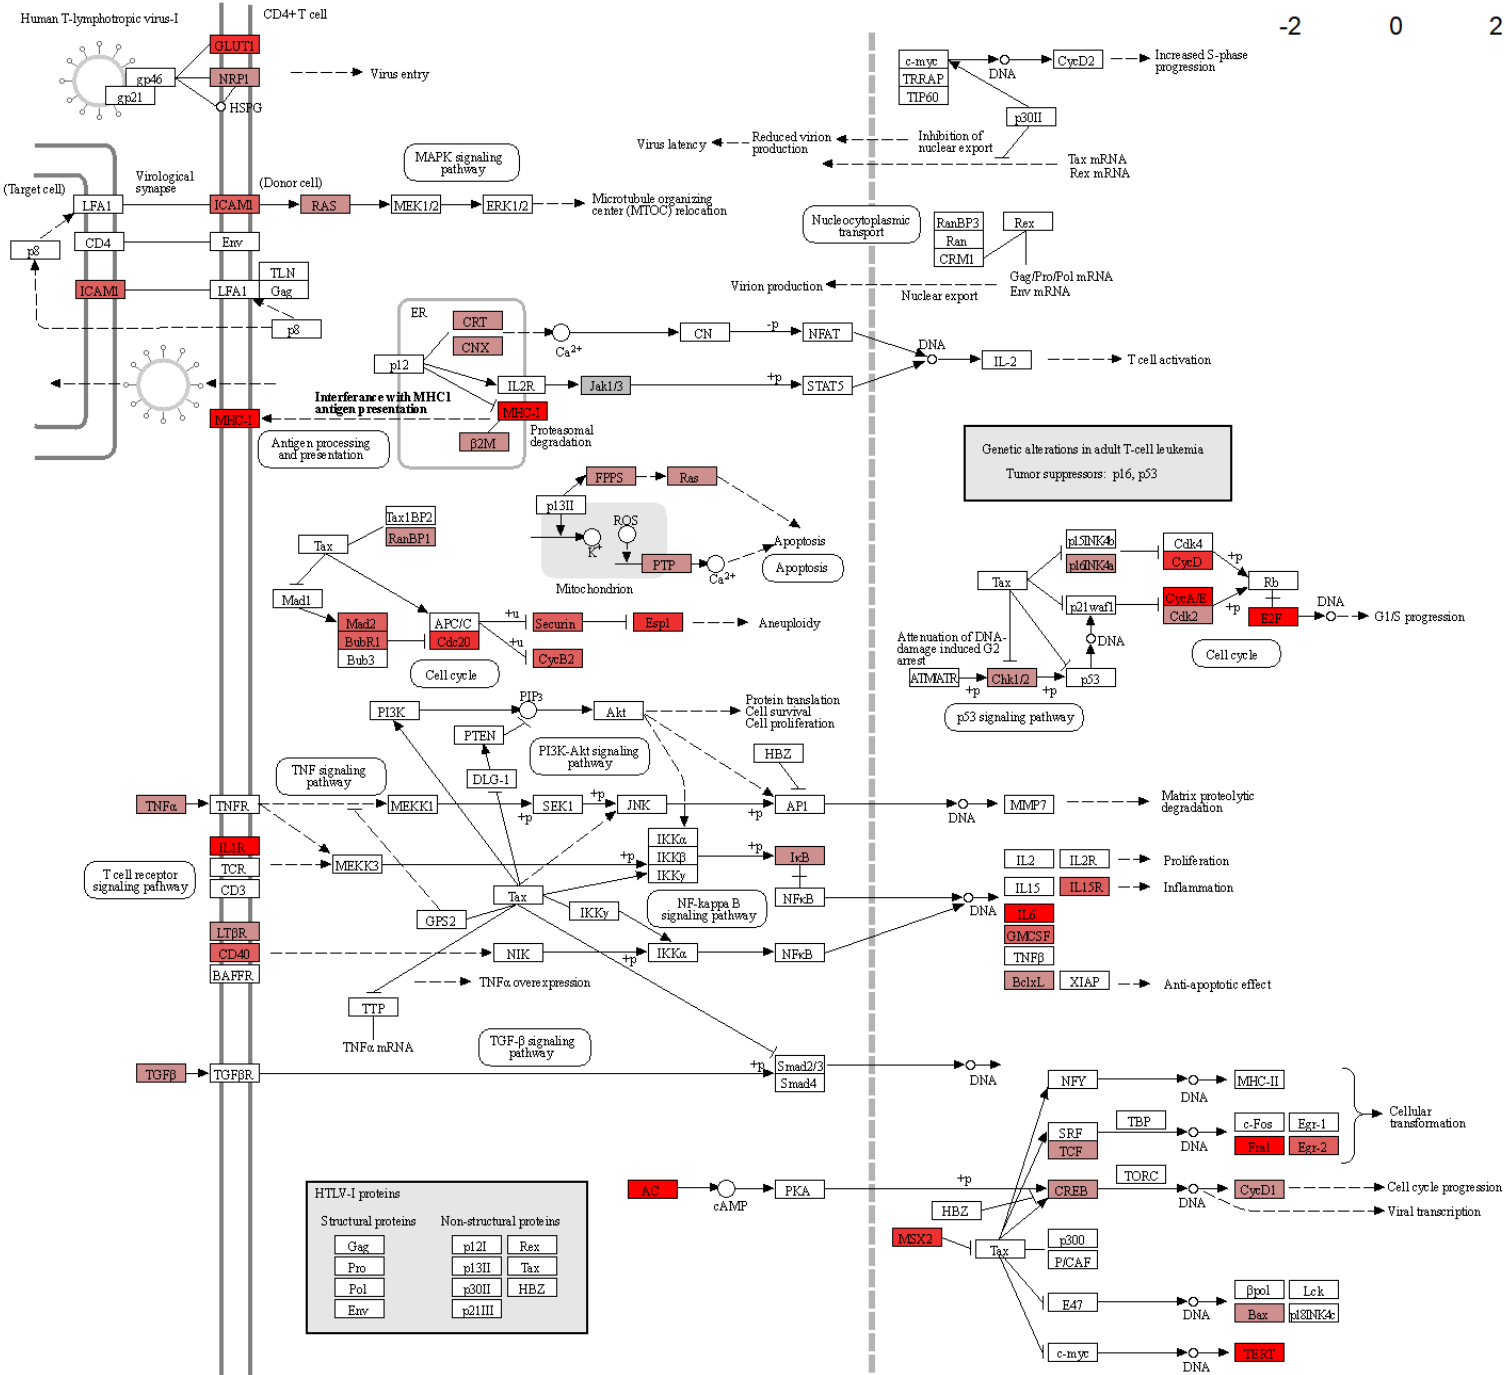

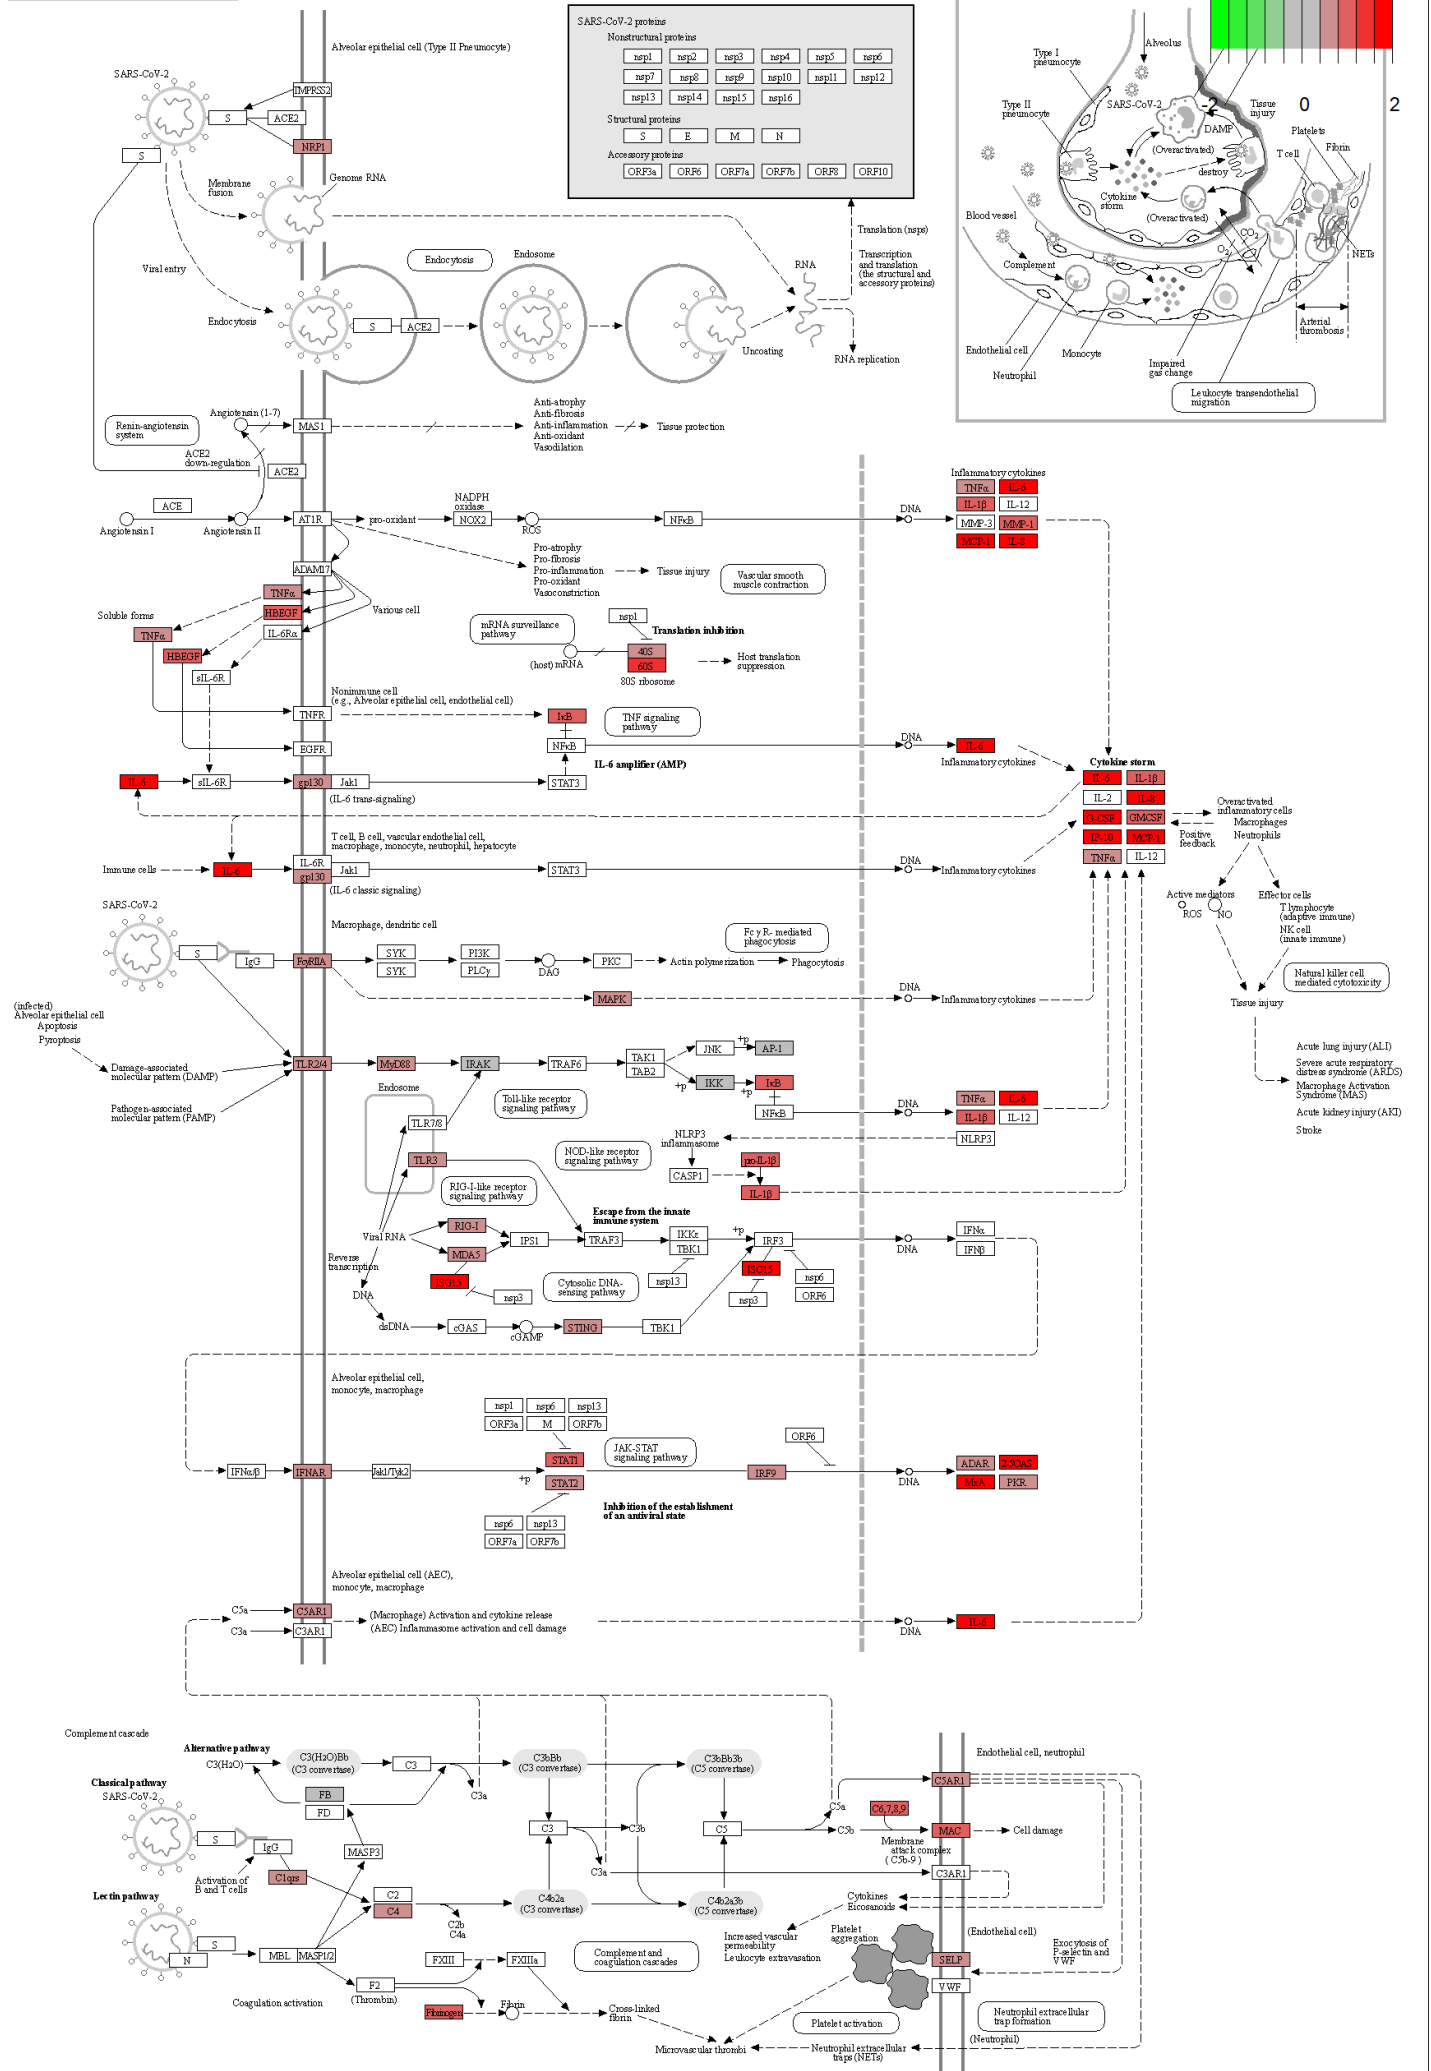

**Figure S9. Key pathways up (red) and downregulated (green) in the culture-positive versus culture-negative decedents. Figures were constructed using the Kyoto Encyclopaedia of Genes and Genomes Database.**

### Supplemenraty references.

1. De Paepe, M.E., et al. Postmortem RNA and protein stability in perinatal human lungs. *Diagn Mol Pathol* **11**, 170-176 (2002).
2. Fan, J., et al. Quantification of nucleic acid quality in postmortem tissues from a cancer research autopsy program. *Oncotarget* **7**, 66906-66921 (2016).
3. Floros, J., et al. The utility of postmortem lung for RNA studies; variability and correlation of the expression of surfactant proteins in human lung. *Exp Lung Res* **17**, 91-104 (1991).
4. Levy, Y., et al. CD177, a specific marker of neutrophil activation, is associated with coronavirus disease 2019 severity and death. *iScience* **24**, 102711 (2021).
5. Fu, J., et al. The clinical implication of dynamic neutrophil to lymphocyte ratio and D-dimer in COVID-19: A retrospective study in Suzhou China. *Thromb Res* **192**, 3-8 (2020).
6. Aschenbrenner, A.C., et al. Disease severity-specific neutrophil signatures in blood transcriptomes stratify COVID-19 patients. *Genome Med* **13**, 7 (2021).
7. Hudak, A., Letoha, A., Szilak, L. & Letoha, T. Contribution of syndecans to the cellular entry of SARS-CoV-2. *Int J Mol Sci* **22**(2021).
8. Noske G D, d.S.S.E., de Godoy M O, Dolci I, Fernandes R S, Guido R V C, Sjö P, Oliva G. Structural basis of nirmatrelvir and ensitrelvir resistance profiles against SARS-CoV-2 Main Protease naturally occurring polymorphisms. *bioRxiv* (2022).
